# Supplementary material for: miR-458b-5p regulates ovarian granulosa cells proliferation through Wnt/β-catenin signaling pathway by targeting catenin beta-1
Source: PubMed Central journal article supplement (PMC8100484; doi:10.5713/ajas.20.0392), 2020-10-13
Supplement: ajas-20-0392-suppl.pdf [file ajas-20-0392-suppl.pdf]

**Table S1 miR-458b-5p target genes predicted using TargetScan**

| Target gene | Representative transcript | Gene name      | 3P-seq tag | Total sites | 8mer sites | 7mer-m8 site |
|-------------|---------------------------|----------------|------------|-------------|------------|--------------|
| PLA2G15     | ENST00000566188.1         | phospholipas   | 2670       | 3           | 1          | 2            |
| DPYSL3      | ENST00000398514.3         | dihydropyrim   | 5209       | 1           | 1          | 0            |
| SOWAHC      | ENST00000356454.3         | sosondowah     | 431        | 1           | 1          | 0            |
| CARF        | ENST00000402905.3         | calcium resp   | 27         | 2           | 1          | 1            |
| POFUT2      | ENST00000349485.5         | protein O-fuc  | 842        | 1           | 1          | 0            |
| YES1        | ENST00000577961.1         | v-yes-1 Yam    | 168        | 2           | 2          | 0            |
| PTN         | ENST00000393083.2         | pleiotrophin   | 11         | 1           | 1          | 0            |
| CASP2       | ENST00000310447.5         | caspase 2, ap  | 274        | 1           | 1          | 0            |
| BCL7A       | ENST00000538010.1         | B-cell CLL/l   | 96         | 1           | 1          | 0            |
| KIAA1715    | ENST00000272748.4         | KIAA1715       | 858        | 1           | 1          | 0            |
| ARL8B       | ENST00000419534.2         | ADP-ribosyl    | 664        | 2           | 2          | 0            |
| PHIP        | ENST00000275034.4         | pleckstrin ho  | 668        | 2           | 2          | 0            |
| CLIC4       | ENST00000374379.4         | chloride intr  | 226        | 1           | 1          | 0            |
| KREMEN1     | ENST00000400335.4         | kringle conta  | 606        | 1           | 1          | 0            |
| ANKRD44     | ENST00000282272.8         | ankyrin repe   | 187        | 1           | 1          | 0            |
| CXCR5       | ENST00000292174.4         | chemokine (C   | 5          | 1           | 1          | 0            |
| GAB2        | ENST00000340149.2         | GRB2-associ    | 627        | 1           | 1          | 0            |
| AC019294.1  | ENST00000543887.1         |                | 5          | 1           | 1          | 0            |
| CDC20B      | ENST00000334206.5         | cell division  | 5          | 1           | 1          | 0            |
| SLC35E1     | ENST00000595753.1         | solute carrier | 4273       | 1           | 1          | 0            |
| MPST        | ENST00000404393.1         | mercaptopyri   | 145        | 1           | 1          | 0            |
| LIN28B      | ENST00000345080.4         | lin-28 homol   | 118        | 2           | 1          | 1            |
| KIAA0895    | ENST00000297063.6         | KIAA0895       | 1104       | 1           | 1          | 0            |
| SLC25A21    | ENST00000331299.5         | solute carrier | 110        | 1           | 1          | 0            |
| TMEM182     | ENST00000412401.2         | transmembra    | 69         | 1           | 1          | 0            |
| CCDC148     | ENST00000283233.5         | coiled-coil d  | 5          | 1           | 1          | 0            |
| OTX2        | ENST00000339475.5         | orthodenticle  | 5          | 1           | 1          | 0            |
| SDR42E1     | ENST00000328945.5         | short chain d  | 164        | 2           | 1          | 0            |
| MYBL1       | ENST00000522677.3         | v-myb avian    | 53         | 1           | 0          | 1            |
| RSPH10B     | ENST00000539903.1         | radial spoke   | 5          | 1           | 1          | 0            |
| RNF111      | ENST00000348370.4         | ring finger pr | 395        | 1           | 1          | 0            |
| ZBTB10      | ENST00000430430.1         | zinc finger ar | 113        | 2           | 1          | 0            |
| AEBP2       | ENST00000266508.9         | AE binding p   | 1228       | 1           | 1          | 0            |
| TLN2        | ENST00000561311.1         | talin 2        | 371        | 1           | 1          | 0            |
| KCNQ3       | ENST00000388996.4         | potassium vo   | 5          | 1           | 1          | 0            |
| BCAT1       | ENST00000261192.7         | branched cha   | 1346       | 1           | 1          | 0            |
| ATF3        | ENST00000366983.1         | activating tra | 2704       | 1           | 1          | 0            |
| GATA2       | ENST00000341105.2         | GATA bindin    | 231        | 1           | 1          | 0            |
| DRD5        | ENST00000304374.2         | dopamine rec   | 5          | 1           | 1          | 0            |
| BMI1        | ENST00000376663.3         | BMI1 polyc     | 200        | 1           | 1          | 0            |
| PLCXD3      | ENST00000377801.3         | phosphatidyl   | 81         | 1           | 0          | 1            |
| TMEM33      | ENST00000504986.1         | transmembra    | 1470       | 2           | 1          | 0            |
| FAM13C      | ENST00000373867.3         | family with s  | 343        | 1           | 1          | 0            |
| CNOT8       | ENST00000285896.6         | CCR4-NOT       | 319        | 1           | 1          | 0            |
| ZNF367      | ENST00000375256.4         | zinc finger pr | 325        | 1           | 1          | 0            |
| TGFBR1      | ENST00000374994.4         | transforming   | 249        | 2           | 0          | 1            |

|            |                   |                 |      |   |   |   |
|------------|-------------------|-----------------|------|---|---|---|
| PTPN12     | ENST00000248594.6 | protein tyrosi  | 167  | 1 | 1 | 0 |
| BICC1      | ENST00000373886.3 | bicaudal C h    | 165  | 1 | 0 | 1 |
| COMMD3-B   | ENST00000602390.1 | COMMD3-B        | 195  | 1 | 1 | 0 |
| KCNRG      | ENST00000360473.4 | potassium ch    | 5    | 1 | 0 | 1 |
| MAS1       | ENST00000252660.4 | MAS1 oncog      | 5    | 1 | 0 | 1 |
| GRM7       | ENST00000486284.1 | glutamate rec   | 5    | 1 | 1 | 0 |
| SLC19A2    | ENST00000236137.5 | solute carrier  | 229  | 1 | 0 | 1 |
| RGL1       | ENST00000304685.4 | ral guanine n   | 188  | 1 | 1 | 0 |
| ANKIB1     | ENST00000265742.3 | ankyrin repe    | 127  | 2 | 2 | 0 |
| RASSF8     | ENST00000541490.1 | Ras associati   | 1290 | 1 | 1 | 0 |
| PDSS1      | ENST00000376203.5 | prenyl (deca)   | 41   | 1 | 0 | 1 |
| MAP3K7     | ENST00000369325.3 | mitogen-acti    | 1172 | 3 | 0 | 1 |
| TSC1       | ENST00000298552.3 | tuberous scl    | 838  | 1 | 1 | 0 |
| BICD2      | ENST00000356884.6 | bicaudal D h    | 38   | 1 | 1 | 0 |
| AC012215.1 | ENST00000437887.1 | Uncharacteri    | 31   | 1 | 0 | 0 |
| PCNP       | ENST00000296024.5 | PEST proteo     | 944  | 2 | 1 | 0 |
| FOXO3      | ENST00000343882.6 | forkhead box    | 32   | 2 | 1 | 1 |
| FGB        | ENST00000302068.4 | fibrinogen be   | 1017 | 1 | 0 | 1 |
| GRIK1-AS2  | ENST00000333765.4 | GRIK1 antis     | 5    | 1 | 0 | 0 |
| FSTL4      | ENST00000265342.7 | follistatin-lik | 60   | 1 | 1 | 0 |
| CACNA2D1   | ENST00000356860.3 | calcium chan    | 418  | 1 | 1 | 0 |
| DYX1C1     | ENST00000457155.2 | dyslexia susc   | 5    | 1 | 0 | 1 |
| ONECUT2    | ENST00000491143.2 | one cut home    | 847  | 2 | 0 | 2 |
| SEMA3C     | ENST00000265361.3 | sema domain     | 45   | 2 | 0 | 1 |
| ZBTB16     | ENST00000335953.4 | zinc finger ar  | 73   | 2 | 0 | 2 |
| ZNF800     | ENST00000393313.1 | zinc finger pi  | 239  | 1 | 0 | 1 |
| PHF21B     | ENST00000403565.1 | PHD finger p    | 8    | 1 | 1 | 0 |
| MST4       | ENST00000394334.2 | Serine/threor   | 47   | 2 | 0 | 1 |
| SALL3      | ENST00000575389.2 | sal-like 3 (Di  | 64   | 2 | 1 | 1 |
| NT5C3A     | ENST00000610140.1 | 5'-nucleotida   | 165  | 1 | 0 | 1 |
| CAV2       | ENST00000222693.4 | caveolin 2      | 1191 | 1 | 0 | 1 |
| ECT2       | ENST00000232458.5 | epithelial cel  | 220  | 1 | 0 | 1 |
| FMR1       | ENST00000370471.3 | fragile X me    | 1155 | 1 | 1 | 0 |
| FCHO2      | ENST00000430046.2 | FCH domain      | 158  | 1 | 1 | 0 |
| RASA2      | ENST00000286364.3 | RAS p21 pro     | 170  | 1 | 0 | 1 |
| VPS54      | ENST00000409558.4 | vacuolar prot   | 312  | 1 | 1 | 0 |
| HOXD3      | ENST00000249440.3 | homeobox D      | 23   | 1 | 1 | 0 |
| SERPINF1   | ENST00000254722.4 | serpin peptid   | 596  | 1 | 0 | 1 |
| CELF1      | ENST00000395290.2 | CUGBP, Ela      | 153  | 2 | 0 | 0 |
| OTUD7A     | ENST00000307050.4 | OTU domain      | 35   | 1 | 1 | 0 |
| PHTF2      | ENST00000416283.2 | putative hom    | 1730 | 1 | 1 | 0 |
| TFRC       | ENST00000540528.1 | transferrin re  | 296  | 1 | 0 | 0 |
| PAQR3      | ENST00000512733.1 | progesterin anc | 217  | 2 | 1 | 0 |
| ARFGEF1    | ENST00000262215.3 | ADP-ribosyl     | 70   | 2 | 2 | 0 |
| IBTK       | ENST00000306270.7 | inhibitor of E  | 40   | 1 | 1 | 0 |
| TMEM132B   | ENST00000299308.3 | transmembra     | 5    | 1 | 0 | 1 |
| LHFP       | ENST00000379589.3 | lipoma HMG      | 5    | 1 | 0 | 1 |
| PPFIA2     | ENST00000549396.1 | protein tyrosi  | 5    | 1 | 1 | 0 |

|             |                   |                 |      |   |   |   |
|-------------|-------------------|-----------------|------|---|---|---|
| DACH1       | ENST00000305425.4 | dachshund h     | 18   | 2 | 0 | 0 |
| SLC32A1     | ENST00000217420.1 | solute carrier  | 5    | 1 | 0 | 0 |
| USP6        | ENST00000332776.4 | ubiquitin spe   | 5    | 2 | 0 | 0 |
| ZNF667      | ENST00000591790.1 | zinc finger pi  | 24   | 1 | 0 | 0 |
| TXNDC9      | ENST00000264255.3 | thioredoxin c   | 873  | 1 | 0 | 0 |
| HDHD2       | ENST00000300605.6 | haloacid deh:   | 501  | 1 | 0 | 1 |
| BRD3        | ENST00000303407.7 | bromodomai      | 77   | 1 | 0 | 1 |
| ARHGAP12    | ENST00000311380.4 | Rho GTPase      | 190  | 2 | 0 | 1 |
| CLCN6       | ENST00000312413.6 | chloride char   | 227  | 1 | 0 | 1 |
| ADAMTS18    | ENST00000282849.5 | ADAM meta       | 7    | 1 | 1 | 0 |
| FAM73B      | ENST00000277475.5 | family with s   | 651  | 1 | 0 | 1 |
| FSTL5       | ENST00000306100.5 | follistatin-lik | 5    | 1 | 0 | 1 |
| PPFIA1      | ENST00000253925.7 | protein tyrosi  | 760  | 1 | 1 | 0 |
| KIAA0247    | ENST00000342745.4 | KIAA0247        | 161  | 1 | 0 | 1 |
| STAM        | ENST00000377524.3 | signal transd   | 723  | 1 | 0 | 0 |
| PARD6B      | ENST00000371610.2 | par-6 family    | 277  | 1 | 0 | 1 |
| ZC3H12A     | ENST00000373087.6 | zinc finger C   | 94   | 1 | 0 | 1 |
| UST         | ENST00000367463.4 | uronyl-2-sulf   | 933  | 1 | 0 | 1 |
| PYGO1       | ENST00000302000.6 | pygopus hor     | 104  | 1 | 0 | 1 |
| E2F3        | ENST00000346618.3 | E2F transcrip   | 91   | 1 | 0 | 0 |
| XKRX        | ENST00000468904.1 | XK, Kell blo    | 11   | 1 | 0 | 0 |
| SREK1       | ENST00000334121.6 | splicing regu   | 316  | 2 | 2 | 0 |
| ZNF385B     | ENST00000410066.1 | zinc finger pi  | 17   | 1 | 0 | 1 |
| MINPP1      | ENST00000371994.4 | multiple inos   | 1079 | 1 | 0 | 1 |
| CTNNB1      | ENST00000349496.5 | catenin (cadh   | 7257 | 1 | 0 | 1 |
| BBX         | ENST00000415149.2 | bobby sox hc    | 141  | 2 | 0 | 2 |
| PAXIP1      | ENST00000404141.1 | PAX interact    | 19   | 1 | 0 | 1 |
| ZCCHC24     | ENST00000372336.3 | zinc finger, C  | 359  | 1 | 0 | 0 |
| PRKG1       | ENST00000373985.1 | protein kinas   | 12   | 2 | 0 | 0 |
| MET         | ENST00000397752.3 | met proto-on    | 1155 | 1 | 0 | 1 |
| HMGN5       | ENST00000358130.2 | high mobility   | 46   | 1 | 1 | 0 |
| MAP1LC3C    | ENST00000357246.3 | microtubule-    | 5    | 1 | 0 | 0 |
| WASL        | ENST00000223023.4 | Wiskott-Aldr    | 230  | 1 | 1 | 0 |
| PRKCA       | ENST00000413366.3 | protein kinas   | 726  | 1 | 0 | 0 |
| HSPA4L      | ENST00000296464.4 | heat shock 70   | 348  | 2 | 0 | 1 |
| RP6-24A23.0 | ENST00000563887.1 | Uncharacteri    | 937  | 1 | 0 | 0 |
| HNRNPA3     | ENST00000411529.2 | heterogeneou    | 329  | 2 | 1 | 0 |
| NPAS3       | ENST00000346562.2 | neuronal PA'    | 9    | 1 | 1 | 0 |
| DCBLD2      | ENST00000326840.6 | discoidin, CU   | 798  | 1 | 0 | 1 |
| CACHD1      | ENST00000371073.2 | cache domain    | 2071 | 1 | 0 | 1 |
| EPN2        | ENST00000314728.5 | epsin 2         | 1609 | 1 | 0 | 1 |
| ETV1        | ENST00000430479.1 | ets variant 1   | 160  | 2 | 0 | 1 |
| SMARCA1     | ENST00000371121.3 | SWI/SNF rel     | 348  | 1 | 0 | 1 |
| FAM19A1     | ENST00000478136.1 | family with s   | 5    | 1 | 0 | 0 |
| SMIM13      | ENST00000416247.2 | small integra   | 199  | 1 | 0 | 1 |
| STAU2       | ENST00000522695.1 | staufen doub    | 306  | 1 | 0 | 1 |
| SKOR1       | ENST00000341418.5 | SKI family tr   | 22   | 1 | 0 | 0 |
| ZNF749      | ENST00000334181.4 | zinc finger pi  | 69   | 1 | 0 | 1 |

|          |                   |                |       |   |   |   |
|----------|-------------------|----------------|-------|---|---|---|
| PAFAH1B1 | ENST00000397195.5 | platelet-activ | 1570  | 1 | 1 | 0 |
| MACROD2  | ENST00000217246.4 | MACRO dor      | 5     | 1 | 0 | 1 |
| ANKRD46  | ENST00000335659.3 | ankyrin repea  | 33    | 1 | 1 | 0 |
| BEST1    | ENST00000449131.2 | bestrophin 1   | 83    | 1 | 0 | 0 |
| SMO      | ENST00000249373.3 | smoothened,    | 142   | 1 | 0 | 1 |
| PDE10A   | ENST00000366882.1 | phosphodiect   | 371   | 2 | 0 | 1 |
| ALCAM    | ENST00000306107.5 | activated leu  | 371   | 1 | 0 | 1 |
| SNAP91   | ENST00000521485.1 | synaptosoma    | 68    | 1 | 0 | 1 |
| CDH2     | ENST00000269141.3 | cadherin 2, ty | 1230  | 1 | 0 | 1 |
| EIF2S3L  | ENST00000538173.1 | Putative eukæ  | 8     | 1 | 1 | 0 |
| KITLG    | ENST00000228280.5 | KIT ligand     | 100   | 1 | 0 | 1 |
| ASPN     | ENST00000375543.1 | asporin        | 5     | 1 | 0 | 0 |
| B3GALT2  | ENST00000367434.4 | UDP-Gal:bet    | 5     | 1 | 0 | 0 |
| PLEKHA1  | ENST00000538022.1 | pleckstrin ho  | 1172  | 1 | 0 | 0 |
| RGS17    | ENST00000367225.2 | regulator of G | 11    | 1 | 1 | 0 |
| ROR2     | ENST00000375708.3 | receptor tyro  | 43    | 1 | 0 | 0 |
| LAMA2    | ENST00000421865.2 | laminin, alph  | 5     | 1 | 0 | 0 |
| IQCK     | ENST00000320394.6 | IQ motif con   | 42    | 1 | 0 | 1 |
| TBC1D12  | ENST00000225235.4 | TBC1 domai     | 172   | 1 | 0 | 0 |
| SELT     | ENST00000471696.1 | Selenoprotein  | 538   | 1 | 0 | 0 |
| CPEB3    | ENST00000412050.4 | cytoplasmic j  | 48    | 2 | 0 | 0 |
| KIF13A   | ENST00000378814.5 | kinesin famil  | 725   | 1 | 0 | 0 |
| GNA13    | ENST00000439174.2 | guanine nucl   | 190   | 1 | 0 | 1 |
| YWHAZ    | ENST00000395957.2 | tyrosine 3-m   | 184   | 1 | 0 | 0 |
| VAPB     | ENST00000395802.3 | VAMP (vesic    | 391   | 1 | 0 | 0 |
| PLD1     | ENST00000342215.6 | phospholipas   | 128   | 2 | 0 | 1 |
| HTRA1    | ENST00000368984.3 | HtrA serine p  | 1012  | 1 | 0 | 0 |
| PICK1    | ENST00000404072.3 | protein interæ | 155   | 1 | 0 | 0 |
| SYNPR    | ENST00000479198.1 | synaptoporin   | 5     | 1 | 0 | 1 |
| MSRB3    | ENST00000308259.5 | methionine s   | 83    | 1 | 0 | 0 |
| WDR44    | ENST00000254029.3 | WD repeat d    | 392   | 1 | 0 | 1 |
| ARHGEF3  | ENST00000296315.3 | Rho guanine    | 359   | 1 | 0 | 1 |
| CTGF     | ENST00000367976.3 | connective ti  | 10083 | 1 | 0 | 0 |
| KLHL9    | ENST00000359039.4 | kelch-like fa  | 222   | 1 | 0 | 0 |
| DTX1     | ENST00000257600.3 | deltex homol   | 10    | 1 | 0 | 0 |
| KLHL13   | ENST00000371882.1 | kelch-like fa  | 13    | 1 | 0 | 0 |
| FAM199X  | ENST00000493442.1 | family with s  | 856   | 1 | 0 | 1 |
| EFNA5    | ENST00000333274.6 | ephrin-A5      | 225   | 1 | 0 | 0 |
| PARPBP   | ENST00000378128.3 | PARP1 bindi    | 456   | 1 | 0 | 0 |
| LRIG1    | ENST00000273261.3 | leucine-rich 1 | 241   | 1 | 0 | 0 |
| FLOT2    | ENST00000394906.2 | flotillin 2    | 37    | 2 | 0 | 1 |
| TULP4    | ENST00000367094.2 | tubby like pr  | 93    | 1 | 0 | 0 |
| CTNNAL1  | ENST00000374595.4 | catenin (cadf  | 5702  | 1 | 0 | 0 |
| ZNF492   | ENST00000456783.2 | zinc finger pr | 5     | 1 | 0 | 0 |
| SRRM1    | ENST00000323848.9 | serine/argini  | 7     | 1 | 0 | 0 |
| AXIN2    | ENST00000307078.5 | axin 2         | 86    | 1 | 0 | 0 |
| MYB      | ENST00000367814.4 | v-myb avian    | 39    | 1 | 0 | 0 |
| CAPRIN2  | ENST00000395805.2 | caprin family  | 17    | 1 | 0 | 1 |

|           |                   |                |      |   |   |   |
|-----------|-------------------|----------------|------|---|---|---|
| USP7      | ENST00000344836.4 | ubiquitin spe  | 656  | 1 | 0 | 0 |
| SOCS6     | ENST00000397942.3 | suppressor of  | 140  | 1 | 1 | 0 |
| TP63      | ENST00000392460.3 | tumor protei   | 0    | 1 | 0 | 0 |
| TMEM200A  | ENST00000296978.3 | transmembra    | 1609 | 1 | 0 | 0 |
| BRWD3     | ENST00000373275.4 | bromodomai     | 506  | 1 | 1 | 0 |
| HMGXB4    | ENST00000216106.5 | HMG box dc     | 966  | 1 | 0 | 0 |
| NUP54     | ENST00000264883.3 | nucleoporin :  | 721  | 1 | 0 | 1 |
| DDX42     | ENST00000578681.1 | DEAD (Asp-     | 797  | 1 | 0 | 0 |
| PTGER4    | ENST00000302472.3 | prostaglandir  | 326  | 1 | 0 | 0 |
| LONRF2    | ENST00000393437.3 | LON peptida    | 394  | 1 | 1 | 0 |
| ZNF608    | ENST00000504926.1 | zinc finger pi | 22   | 1 | 0 | 0 |
| CACNB2    | ENST00000396576.2 | calcium chan   | 52   | 1 | 0 | 0 |
| GJA1      | ENST00000282561.3 | gap junction   | 1732 | 1 | 0 | 0 |
| C17orf103 | ENST00000468196.1 | chromosome     | 54   | 1 | 0 | 0 |
| E2F7      | ENST00000416496.2 | E2F transcrip  | 308  | 1 | 0 | 0 |
| SLC30A1   | ENST00000367001.4 | solute carrier | 831  | 1 | 0 | 0 |
| CD164     | ENST00000368961.5 | CD164 mole     | 2038 | 1 | 1 | 0 |
| ATP2A2    | ENST00000395494.2 | ATPase, Ca+    | 2042 | 1 | 0 | 1 |
| SRPK2     | ENST00000393651.3 | SRSF proteir   | 381  | 1 | 0 | 1 |
| TRERF1    | ENST00000541110.1 | transcription: | 52   | 1 | 0 | 0 |
| STT3B     | ENST00000295770.2 | STT3B, subu    | 4458 | 1 | 0 | 0 |
| PCDH10    | ENST00000264360.5 | protocadheri   | 9    | 1 | 0 | 0 |
| MTSS1L    | ENST00000338779.6 | metastasis su  | 2982 | 1 | 0 | 0 |
| NFIA      | ENST00000403491.3 | nuclear facto  | 5    | 3 | 1 | 0 |
| BUB3      | ENST00000368865.4 | BUB3 mitoti    | 5237 | 1 | 0 | 0 |
| WNT3      | ENST00000225512.5 | wingless-typ   | 46   | 1 | 0 | 0 |
| SAMSN1    | ENST00000400564.1 | SAM domair     | 5    | 1 | 0 | 0 |
| SRSF6     | ENST00000244020.3 | serine/argini  | 1914 | 1 | 0 | 0 |
| TEAD1     | ENST00000361905.4 | TEA domain     | 740  | 1 | 0 | 0 |
| APPL1     | ENST00000288266.3 | adaptor prote  | 908  | 1 | 0 | 1 |
| SLC25A13  | ENST00000265631.5 | solute carrier | 8    | 1 | 0 | 1 |
| SEMA6D    | ENST00000355997.3 | sema domain    | 179  | 1 | 0 | 1 |
| KAT7      | ENST00000259021.4 | K(lysine) acc  | 48   | 1 | 0 | 0 |
| PFN2      | ENST00000239940.7 | profilin 2     | 2184 | 1 | 0 | 0 |
| CEP85L    | ENST00000368491.3 | centrosomal    | 14   | 1 | 0 | 0 |
| STEAP2    | ENST00000287908.3 | STEAP fami     | 266  | 1 | 0 | 0 |
| TSHZ1     | ENST00000322038.5 | teashirt zinc  | 174  | 1 | 0 | 0 |
| UBR2      | ENST00000372883.3 | ubiquitin pro  | 728  | 1 | 0 | 0 |
| SPRY3     | ENST00000302805.2 | sprouty hom    | 5    | 1 | 0 | 0 |
| LUC7L3    | ENST00000505658.1 | LUC7-like 3    | 2970 | 1 | 0 | 0 |
| ERN1      | ENST00000433197.3 | endoplasmic    | 182  | 1 | 0 | 0 |
| AP3M1     | ENST00000355264.4 | adaptor-relat  | 601  | 1 | 0 | 0 |
| STX16     | ENST00000355957.5 | syntaxin 16    | 756  | 1 | 0 | 0 |
| BTBD1     | ENST00000379403.2 | BTB (POZ) c    | 84   | 1 | 1 | 0 |
| SH3GL3    | ENST00000535412.1 | SH3-domain     | 74   | 1 | 0 | 1 |
| MBTD1     | ENST00000586178.1 | mbt domain c   | 113  | 1 | 0 | 0 |
| CADM2     | ENST00000383699.3 | cell adhesion  | 5    | 1 | 0 | 1 |
| GOLPH3    | ENST00000265070.6 | golgi phosph   | 1157 | 1 | 0 | 0 |

|           |                   |                |      |   |   |   |
|-----------|-------------------|----------------|------|---|---|---|
| CLUH      | ENST00000570628.2 | clustered mit  | 125  | 1 | 0 | 0 |
| MYT1L     | ENST00000399161.2 | myelin transc  | 5    | 1 | 0 | 0 |
| ITCH      | ENST00000374864.4 | itchy E3 ubiq  | 769  | 1 | 1 | 0 |
| MAPK8IP3  | ENST00000250894.4 | mitogen-acti   | 100  | 1 | 1 | 0 |
| RNFT1     | ENST00000442346.2 | ring finger pr | 6    | 1 | 0 | 0 |
| ASAP2     | ENST00000315273.4 | ArfGAP with    | 38   | 1 | 1 | 0 |
| CCDC144A  | ENST00000443444.2 | coiled-coil d  | 5    | 1 | 0 | 0 |
| TMCC1     | ENST00000432054.2 | transmembra    | 97   | 1 | 0 | 1 |
| RAB11FIP2 | ENST00000355624.3 | RAB11 fami     | 449  | 2 | 1 | 1 |
| LYST      | ENST00000389794.3 | lysosomal tra  | 9    | 1 | 1 | 0 |
| DR1       | ENST00000370272.4 | down-regulat   | 2994 | 2 | 0 | 0 |
| PRDM6     | ENST00000407847.4 | PR domain c    | 69   | 1 | 0 | 0 |
| SMARCA2   | ENST00000349721.2 | SWI/SNF rel    | 158  | 1 | 0 | 0 |
| PBRM1     | ENST00000356770.4 | polybromo 1    | 689  | 1 | 0 | 0 |
| C8orf34   | ENST00000337103.4 | chromosome     | 38   | 1 | 0 | 0 |
| KLHL2     | ENST00000538127.1 | kelch-like fa  | 511  | 1 | 0 | 1 |
| BCL9      | ENST00000234739.3 | B-cell CLL/l   | 70   | 1 | 0 | 0 |
| ADAM22    | ENST00000398204.4 | ADAM meta      | 115  | 2 | 0 | 1 |
| PTK6      | ENST00000217185.2 | protein tyrosi | 27   | 1 | 0 | 1 |
| ZBTB18    | ENST00000358704.4 | zinc finger ar | 935  | 1 | 0 | 0 |
| ZNF30     | ENST00000601957.1 | zinc finger pr | 99   | 1 | 0 | 0 |
| RASSF3    | ENST00000542104.1 | Ras associati  | 461  | 1 | 0 | 1 |
| ZNF672    | ENST00000306562.3 | zinc finger pr | 189  | 1 | 0 | 0 |
| RNF38     | ENST00000259605.6 | ring finger pr | 348  | 1 | 0 | 0 |
| DOK6      | ENST00000382713.5 | docking prot   | 8    | 1 | 1 | 0 |
| TENM2     | ENST00000519204.1 | teneurin tran  | 162  | 1 | 0 | 0 |
| GLUD1     | ENST00000277865.4 | glutamate de   | 287  | 1 | 1 | 0 |
| ERBB4     | ENST00000342788.4 | v-erb-b2 avia  | 27   | 1 | 0 | 0 |
| LAMA5     | ENST00000252999.3 | laminin, alph  | 267  | 1 | 0 | 0 |
| LHX9      | ENST00000367390.3 | LIM homeob     | 40   | 1 | 0 | 1 |
| ANKRD28   | ENST00000399451.2 | ankyrin repe   | 798  | 1 | 0 | 0 |
| ONECUT1   | ENST00000560699.2 | one cut home   | 10   | 2 | 0 | 1 |
| PRTFDC1   | ENST00000376378.1 | phosphoribos   | 155  | 1 | 0 | 0 |
| XPR1      | ENST00000367590.4 | xenotropic ar  | 544  | 1 | 0 | 0 |
| KAT2B     | ENST00000263754.4 | K(lysine) ace  | 117  | 1 | 0 | 0 |
| ZNF217    | ENST00000371471.2 | zinc finger pr | 668  | 1 | 0 | 0 |
| MTMR9     | ENST00000221086.3 | myotubularir   | 400  | 1 | 0 | 0 |
| GRIK4     | ENST00000527524.2 | glutamate rec  | 5    | 1 | 0 | 0 |
| TXNDC5    | ENST00000539054.1 | thioredoxin c  | 1190 | 1 | 0 | 1 |
| STK39     | ENST00000355999.4 | serine threon  | 266  | 1 | 0 | 1 |
| ARL4A     | ENST00000396663.1 | ADP-ribosyl    | 213  | 1 | 0 | 0 |
| IGF1R     | ENST00000268035.6 | insulin-like g | 561  | 2 | 0 | 1 |
| ARL6IP5   | ENST00000273258.3 | ADP-ribosyl    | 150  | 1 | 0 | 0 |
| MAPK14    | ENST00000229795.3 | mitogen-acti   | 1191 | 1 | 0 | 0 |
| SLC38A2   | ENST00000256689.5 | solute carrier | 696  | 1 | 0 | 0 |
| ITGAV     | ENST00000261023.3 | integrin, alph | 2407 | 1 | 0 | 0 |
| PARD3B    | ENST00000406610.2 | par-3 family   | 38   | 1 | 0 | 0 |
| HS2ST1    | ENST00000370550.5 | heparan sulf   | 787  | 1 | 0 | 0 |

|         |                   |                |      |   |   |   |
|---------|-------------------|----------------|------|---|---|---|
| KLHL15  | ENST00000328046.8 | kelch-like fa  | 42   | 1 | 0 | 1 |
| UGCG    | ENST00000374279.3 | UDP-glucose    | 1200 | 1 | 0 | 0 |
| HOXD4   | ENST00000306324.3 | homeobox D     | 214  | 1 | 0 | 0 |
| STK40   | ENST00000359297.2 | serine/threon  | 214  | 1 | 0 | 0 |
| NAB1    | ENST00000337386.5 | NGFI-A binc    | 279  | 1 | 0 | 1 |
| APBB2   | ENST00000295974.8 | amyloid beta   | 704  | 1 | 0 | 0 |
| ZBTB20  | ENST00000462705.1 | zinc finger ar | 5    | 3 | 0 | 1 |
| PAN3    | ENST00000282391.5 | PAN3 poly(ε    | 361  | 1 | 0 | 1 |
| ATXN7   | ENST00000295900.6 | ataxin 7       | 264  | 1 | 0 | 0 |
| EGFR    | ENST00000275493.2 | epidermal gro  | 632  | 1 | 0 | 1 |
| DLG5    | ENST00000372391.2 | discs, large h | 10   | 1 | 0 | 0 |
| C5orf24 | ENST00000394976.3 | chromosome     | 2668 | 1 | 0 | 0 |
| IMPG1   | ENST00000369963.3 | interphotorec  | 5    | 1 | 0 | 0 |
| PATZ1   | ENST00000405309.3 | POZ (BTB) ε    | 165  | 1 | 0 | 1 |
| G3BP2   | ENST00000395719.3 | GTPase activ   | 4413 | 1 | 0 | 0 |
| MAFF    | ENST00000338483.2 | v-maf avian 1  | 160  | 1 | 0 | 0 |
| SORBS1  | ENST00000371227.4 | sorbin and Sl  | 22   | 1 | 0 | 0 |
| TXLNG   | ENST00000380122.5 | taxilin gamm   | 96   | 1 | 0 | 0 |
| NOS1AP  | ENST00000361897.5 | nitric oxide s | 5    | 1 | 0 | 1 |
| YPEL5   | ENST00000379520.3 | yippee-like 5  | 307  | 1 | 0 | 0 |
| CLOCK   | ENST00000309964.4 | clock circadi  | 86   | 1 | 0 | 1 |
| ATP13A3 | ENST00000439040.1 | ATPase type    | 243  | 1 | 0 | 1 |
| HELZ    | ENST00000358691.5 | helicase with  | 571  | 1 | 0 | 0 |
| TMTC3   | ENST00000266712.6 | transmembra    | 406  | 1 | 0 | 0 |
| CUL5    | ENST00000393094.2 | cullin 5       | 761  | 1 | 0 | 0 |
| RNF144A | ENST00000320892.6 | ring finger pt | 124  | 1 | 0 | 0 |
| SLC7A14 | ENST00000231706.5 | solute carrier | 5    | 1 | 0 | 1 |
| YPEL2   | ENST00000312655.4 | yippee-like 2  | 62   | 1 | 0 | 0 |
| INO80D  | ENST00000403263.1 | INO80 comp     | 5    | 1 | 0 | 0 |
| CDYL    | ENST00000343762.5 | chromodoma     | 24   | 1 | 0 | 0 |
| SAMD8   | ENST00000372687.4 | sterile alpha  | 100  | 1 | 0 | 1 |
| RSF1    | ENST00000308488.6 | remodeling a   | 216  | 1 | 0 | 1 |
| LMNB2   | ENST00000325327.3 | lamin B2       | 89   | 1 | 0 | 0 |
| SPOPL   | ENST00000280098.4 | speckle-type   | 216  | 1 | 0 | 0 |
| NEBL    | ENST00000377122.4 | nebullette     | 181  | 1 | 0 | 0 |
| CNTN1   | ENST00000551295.2 | contactin 1    | 40   | 1 | 0 | 0 |
| SLC44A5 | ENST00000370859.3 | solute carrier | 395  | 1 | 0 | 0 |
| SLC10A7 | ENST00000264986.3 | solute carrier | 77   | 1 | 0 | 1 |
| CDK14   | ENST00000380050.3 | cyclin-depen   | 226  | 1 | 0 | 0 |
| RCAN3   | ENST00000374395.4 | RCAN famil     | 395  | 1 | 0 | 0 |
| ZBTB33  | ENST00000326624.2 | zinc finger ar | 65   | 1 | 1 | 0 |
| IRS2    | ENST00000375856.3 | insulin recep  | 231  | 1 | 0 | 1 |
| NUTF2   | ENST00000219169.4 | nuclear trans  | 222  | 1 | 0 | 0 |
| ZBTB2   | ENST00000325144.4 | zinc finger ar | 832  | 1 | 0 | 0 |
| TFAP2A  | ENST00000379613.3 | transcription  | 367  | 1 | 0 | 1 |
| CASP8   | ENST00000392259.2 | caspase 8, ap  | 64   | 1 | 0 | 0 |
| SLC12A2 | ENST00000262461.2 | solute carrier | 655  | 1 | 0 | 1 |
| VAV3    | ENST00000370056.4 | vav 3 guanin   | 1128 | 1 | 0 | 1 |

|          |                   |                |      |   |   |   |
|----------|-------------------|----------------|------|---|---|---|
| NHSL1    | ENST00000427025.2 | NHS-like 1     | 393  | 1 | 0 | 0 |
| MAP7D2   | ENST00000379651.3 | MAP7 doma      | 490  | 1 | 0 | 1 |
| HEY1     | ENST00000354724.3 | hairy/enhanc   | 33   | 1 | 1 | 0 |
| IRF2     | ENST00000393593.3 | interferon reg | 420  | 1 | 0 | 0 |
| USP27X   | ENST00000508866.2 | ubiquitin spe  | 260  | 1 | 0 | 0 |
| NF1      | ENST00000358273.4 | neurofibromi   | 161  | 1 | 1 | 0 |
| UBE2E3   | ENST00000410062.4 | ubiquitin-cor  | 15   | 1 | 0 | 0 |
| CXADR    | ENST00000356275.6 | coxsackie vir  | 56   | 1 | 1 | 0 |
| ROBO1    | ENST00000436010.2 | roundabout, :  | 546  | 1 | 0 | 0 |
| SGIP1    | ENST00000371036.3 | SH3-domain     | 180  | 1 | 0 | 1 |
| SNX18    | ENST00000343017.6 | sorting nexin  | 174  | 1 | 0 | 0 |
| BCL2     | ENST00000398117.1 | B-cell CLL/l   | 55   | 1 | 0 | 0 |
| PLXNA1   | ENST00000393409.2 | plexin A1      | 189  | 1 | 0 | 1 |
| GRIA2    | ENST00000296526.7 | glutamate rec  | 5    | 1 | 0 | 0 |
| LDLRAD4  | ENST00000399848.3 | low density l  | 314  | 1 | 0 | 0 |
| CREBZF   | ENST00000398294.2 | CREB/ATF l     | 1115 | 1 | 0 | 0 |
| PTPN3    | ENST00000412145.1 | protein tyrosi | 374  | 1 | 1 | 0 |
| NBR1     | ENST00000542611.1 | neighbor of I  | 1982 | 1 | 0 | 0 |
| BIRC6    | ENST00000421745.2 | baculoviral L  | 555  | 1 | 0 | 0 |
| PUM2     | ENST00000338086.5 | pumilio RNA    | 1047 | 1 | 0 | 0 |
| USP22    | ENST00000261497.4 | ubiquitin spe  | 2152 | 1 | 0 | 0 |
| ZFP1     | ENST00000464850.1 | ZFP1 zinc fin  | 32   | 1 | 0 | 1 |
| ARRDC4   | ENST00000268042.6 | arrestin doma  | 10   | 1 | 0 | 0 |
| PKN2     | ENST00000370521.3 | protein kinas  | 747  | 1 | 1 | 0 |
| RAB8B    | ENST00000321437.4 | RAB8B, mer     | 45   | 1 | 0 | 0 |
| SGCD     | ENST00000435422.3 | sarcoglycan,   | 39   | 1 | 0 | 0 |
| ATF2     | ENST00000487334.2 | activating tra | 123  | 1 | 1 | 0 |
| MBD5     | ENST00000407073.1 | methyl-CpG     | 7    | 1 | 0 | 0 |
| CDK19    | ENST00000368911.3 | cyclin-depen   | 51   | 2 | 0 | 1 |
| MMP16    | ENST00000286614.6 | matrix metall  | 12   | 1 | 1 | 0 |
| ZC3H12B  | ENST00000338957.4 | zinc finger C  | 29   | 1 | 0 | 1 |
| SERTAD2  | ENST00000313349.3 | SERTA dom      | 119  | 1 | 0 | 1 |
| HOMER1   | ENST00000508576.1 | homer homol    | 394  | 1 | 0 | 0 |
| PPP3R1   | ENST00000234310.3 | protein phosf  | 117  | 1 | 0 | 1 |
| AP5M1    | ENST00000261558.3 | adaptor-relat  | 198  | 1 | 0 | 0 |
| RBMS3    | ENST00000396583.3 | RNA binding    | 56   | 1 | 0 | 1 |
| LDB1     | ENST00000361198.5 | LIM domain     | 61   | 1 | 0 | 1 |
| LARP1B   | ENST00000441387.1 | La ribonucle   | 32   | 1 | 0 | 0 |
| CHD7     | ENST00000423902.2 | chromodoma     | 925  | 1 | 1 | 0 |
| OTUB1    | ENST00000538426.1 | OTU domain     | 2977 | 1 | 0 | 0 |
| PALLD    | ENST00000261509.6 | palladin, cytc | 4423 | 1 | 0 | 1 |
| LMO4     | ENST00000370544.5 | LIM domain     | 294  | 1 | 0 | 0 |
| SLC4A10  | ENST00000415876.2 | solute carrier | 5    | 1 | 0 | 0 |
| FBXO33   | ENST00000298097.7 | F-box protei   | 306  | 1 | 0 | 0 |
| ARHGEF38 | ENST00000420470.2 | Rho guanine    | 5    | 1 | 0 | 0 |
| EXOC5    | ENST00000413566.2 | exocyst com    | 242  | 1 | 0 | 0 |
| FAM46A   | ENST00000369754.3 | family with s  | 899  | 1 | 0 | 0 |
| UNC5C    | ENST00000453304.1 | unc-5 homolo   | 60   | 1 | 0 | 0 |



|         |                   |                |      |   |   |   |
|---------|-------------------|----------------|------|---|---|---|
| NFATC3  | ENST00000329524.4 | nuclear facto  | 221  | 1 | 0 | 0 |
| PPM1H   | ENST00000228705.6 | protein phosφ  | 45   | 1 | 1 | 0 |
| HGF     | ENST00000222390.5 | hepatocyte g   | 18   | 1 | 0 | 1 |
| GJC1    | ENST00000426548.1 | gap junction   | 195  | 1 | 1 | 0 |
| DUSP16  | ENST00000298573.4 | dual specific  | 444  | 2 | 0 | 1 |
| MPDZ    | ENST00000319217.7 | multiple PDZ   | 341  | 1 | 0 | 1 |
| GSKIP   | ENST00000555181.1 | GSK3B inter    | 1581 | 1 | 0 | 0 |
| NOVA1   | ENST00000465357.2 | neuro-oncolc   | 5    | 1 | 0 | 0 |
| DLG2    | ENST00000398309.2 | discs, large h | 15   | 1 | 0 | 0 |
| DCUN1D1 | ENST00000292782.4 | DCN1, defec    | 267  | 1 | 0 | 0 |
| CNKSR2  | ENST00000379510.3 | connector en   | 85   | 1 | 0 | 1 |
| FOXP1   | ENST00000318789.4 | forkhead box   | 264  | 2 | 1 | 0 |
| UBN1    | ENST00000262376.6 | ubinnuclein 1  | 586  | 1 | 0 | 1 |
| TANC2   | ENST00000424789.2 | tetratricopept | 155  | 1 | 0 | 0 |
| MTM1    | ENST00000542741.1 | myotubularir   | 68   | 1 | 0 | 0 |
| PER2    | ENST00000254658.3 | period circad  | 106  | 1 | 0 | 0 |
| AFF2    | ENST00000370460.2 | AF4/FMR2 f     | 8    | 1 | 0 | 0 |
| PTBP3   | ENST00000374257.1 | polypyrimidi   | 214  | 2 | 0 | 1 |
| CDYL2   | ENST00000570137.2 | chromodoma     | 239  | 1 | 0 | 0 |
| TNRC6C  | ENST00000335749.4 | trinucleotide  | 248  | 1 | 0 | 0 |
| WWC2    | ENST00000403733.3 | WW and C2      | 717  | 1 | 0 | 0 |
| CXorf23 | ENST00000379687.3 | chromosome     | 30   | 1 | 1 | 0 |
| IQSEC1  | ENST00000273221.4 | IQ motif and   | 415  | 1 | 0 | 0 |
| LMTK2   | ENST00000297293.5 | lemur tyrosin  | 51   | 2 | 0 | 1 |
| OTUD6B  | ENST00000285420.4 | OTU domain     | 18   | 1 | 1 | 0 |
| BCORL1  | ENST00000540052.1 | BCL6 corepr    | 209  | 1 | 1 | 0 |
| ZDHHC17 | ENST00000426126.2 | zinc finger, I | 117  | 1 | 0 | 0 |
| KCNB1   | ENST00000371741.4 | potassium vo   | 5    | 2 | 0 | 1 |
| UNC5D   | ENST00000287272.2 | unc-5 homolo   | 37   | 1 | 0 | 0 |
| SYNC    | ENST00000409190.3 | syncoilin, int | 353  | 1 | 0 | 0 |
| EGFLAM  | ENST00000322350.5 | EGF-like, fib  | 123  | 1 | 0 | 0 |
| AKAP13  | ENST00000394518.2 | A kinase (PR   | 53   | 1 | 0 | 1 |
| ZC3H12C | ENST00000278590.3 | zinc finger C  | 150  | 1 | 0 | 0 |
| EYA4    | ENST00000367895.5 | eyes absent h  | 242  | 1 | 0 | 0 |
| TWIST1  | ENST00000242261.5 | twist basic h  | 190  | 1 | 0 | 0 |
| ABCC5   | ENST00000334444.6 | ATP-binding    | 453  | 1 | 0 | 1 |
| SUZ12   | ENST00000322652.5 | SUZ12 polyc    | 104  | 2 | 1 | 0 |
| PIK3CA  | ENST00000263967.3 | phosphatidyl   | 112  | 1 | 0 | 0 |
| RPUSD1  | ENST00000565809.1 | RNA pseudo     | 1360 | 1 | 0 | 0 |
| STAG2   | ENST00000371160.1 | stromal antig  | 216  | 1 | 0 | 0 |
| FNDC3B  | ENST00000336824.4 | fibronectin ty | 509  | 1 | 0 | 0 |
| RFX3    | ENST00000382004.3 | regulatory fa  | 37   | 1 | 0 | 0 |
| MOB4    | ENST00000233892.4 | MOB family     | 123  | 2 | 0 | 1 |
| NUCKS1  | ENST00000367142.4 | nuclear casei  | 1692 | 1 | 0 | 1 |
| ZFHX4   | ENST00000521891.2 | zinc finger h  | 194  | 1 | 1 | 0 |
| SLC7A1  | ENST00000380752.5 | solute carrier | 338  | 1 | 0 | 0 |
| PHF20   | ENST00000439301.1 | PHD finger φ   | 191  | 1 | 0 | 0 |
| JHDM1D  | ENST00000397560.2 | jumonji C do   | 470  | 1 | 0 | 0 |

|           |                   |                |      |   |   |   |
|-----------|-------------------|----------------|------|---|---|---|
| VCL       | ENST00000372755.3 | vinculin       | 189  | 1 | 0 | 1 |
| CCDC88A   | ENST00000336838.6 | coiled-coil do | 141  | 1 | 0 | 0 |
| RORA      | ENST00000335670.6 | RAR-related    | 102  | 1 | 0 | 0 |
| GPM6B     | ENST00000454189.2 | glycoprotein   | 135  | 1 | 0 | 0 |
| HMGB1     | ENST00000399489.1 | high mobility  | 800  | 1 | 0 | 0 |
| BRD1      | ENST00000457780.2 | bromodomain    | 124  | 1 | 1 | 0 |
| PRLR      | ENST00000342362.5 | prolactin rec  | 95   | 1 | 0 | 1 |
| WNT5A     | ENST00000474267.1 | wingless-type  | 2080 | 1 | 0 | 0 |
| CAV1      | ENST00000405348.1 | caveolin 1, c  | 415  | 1 | 0 | 0 |
| SZRD1     | ENST00000401089.3 | SUZ RNA bi     | 137  | 1 | 0 | 1 |
| MRRF      | ENST00000344641.3 | mitochondria   | 85   | 1 | 0 | 0 |
| POU2F1    | ENST00000367866.2 | POU class 2    | 83   | 1 | 0 | 0 |
| GNAL      | ENST00000334049.6 | guanine nucl   | 99   | 1 | 0 | 0 |
| UBA6      | ENST00000322244.5 | ubiquitin-like | 169  | 1 | 0 | 1 |
| CREB5     | ENST00000357727.2 | cAMP respo     | 54   | 1 | 0 | 0 |
| COBL      | ENST00000265136.7 | cordon-bleu `  | 205  | 1 | 0 | 0 |
| PLAG1     | ENST00000316981.3 | pleiomorphic   | 58   | 1 | 0 | 0 |
| ETNK1     | ENST00000266517.4 | ethanolamine   | 1047 | 1 | 0 | 1 |
| PPM1E     | ENST00000308249.2 | protein phosp  | 178  | 1 | 0 | 0 |
| PHYHIPL   | ENST00000373880.4 | phytanoyl-Cc   | 26   | 1 | 0 | 0 |
| HSPE1-MOI | ENST00000604458.1 | HSPE1-MOI      | 123  | 2 | 0 | 1 |
| PHC3      | ENST00000495893.2 | polyhomeotic   | 366  | 1 | 0 | 0 |
| MARK1     | ENST00000366918.4 | MAP/microt     | 192  | 1 | 0 | 0 |
| ATXN1     | ENST00000244769.4 | ataxin 1       | 106  | 2 | 0 | 0 |
| FUBP1     | ENST00000370767.1 | far upstream   | 2021 | 1 | 0 | 0 |
| MKX       | ENST00000375790.5 | mohawk hor     | 165  | 1 | 0 | 1 |
| SLC38A4   | ENST00000447411.1 | solute carrier | 10   | 1 | 0 | 0 |
| CUX2      | ENST00000261726.6 | cut-like hom   | 15   | 1 | 1 | 0 |
| CTDSPL2   | ENST00000260327.4 | CTD (carbox    | 457  | 1 | 0 | 0 |
| FAM171B   | ENST00000304698.5 | family with s  | 5    | 1 | 0 | 0 |
| TBL1XR1   | ENST00000430069.1 | transducin (b  | 334  | 2 | 0 | 0 |
| TNRC6B    | ENST00000335727.9 | trinucleotide  | 69   | 2 | 0 | 1 |
| TNPO1     | ENST00000337273.5 | transportin 1  | 2041 | 1 | 0 | 0 |
| SOX5      | ENST00000546136.1 | SRY (sex det   | 43   | 1 | 0 | 1 |
| DLC1      | ENST00000276297.4 | deleted in liv | 970  | 1 | 0 | 0 |
| CHD2      | ENST00000394196.4 | chromodoma     | 1237 | 1 | 0 | 0 |
| XKR4      | ENST00000327381.6 | XK, Kell blo   | 5    | 1 | 0 | 0 |
| TRPM3     | ENST00000377110.3 | transient rece | 11   | 1 | 0 | 1 |
| ZNF148    | ENST00000360647.4 | zinc finger pi | 230  | 1 | 0 | 1 |
| MED13L    | ENST00000281928.3 | mediator con   | 73   | 1 | 0 | 0 |
| MON2      | ENST00000546600.1 | MON2 homc      | 784  | 2 | 1 | 1 |
| CMTM4     | ENST00000394106.2 | CKLF-like N    | 22   | 1 | 0 | 0 |
| ZNF439    | ENST00000304030.2 | zinc finger pi | 64   | 1 | 0 | 0 |
| ATAD2B    | ENST00000238789.5 | ATPase fami    | 11   | 1 | 0 | 0 |
| EIF2S1    | ENST00000256383.4 | eukaryotic tr  | 3360 | 1 | 0 | 1 |
| STRBP     | ENST00000447404.2 | spermatid pe   | 575  | 1 | 1 | 0 |
| ATP1B3    | ENST00000539728.1 | ATPase, Na+    | 269  | 1 | 0 | 1 |
| B3GALT1   | ENST00000392690.3 | UDP-Gal:bet    | 35   | 1 | 0 | 0 |

|          |                   |                |      |   |   |   |
|----------|-------------------|----------------|------|---|---|---|
| NRXN1    | ENST00000342183.5 | neurexin 1     | 5    | 1 | 0 | 0 |
| MARCH5   | ENST00000358935.2 | membrane-as    | 881  | 1 | 0 | 1 |
| BTF3L4   | ENST00000489308.2 | basic transcri | 1245 | 2 | 0 | 0 |
| SLC8A1   | ENST00000406785.2 | solute carrier | 61   | 2 | 1 | 1 |
| SOS1     | ENST00000426016.1 | son of sevenl  | 189  | 1 | 0 | 0 |
| USP16    | ENST00000399975.3 | ubiquitin spe  | 42   | 1 | 0 | 0 |
| USP25    | ENST00000285681.2 | ubiquitin spe  | 2012 | 2 | 0 | 2 |
| HOOK3    | ENST00000307602.4 | hook microtu   | 403  | 1 | 0 | 1 |
| HHIP     | ENST00000296575.3 | hedgehog int   | 65   | 1 | 0 | 1 |
| YAF2     | ENST00000327791.4 | YY1 associat   | 413  | 1 | 0 | 0 |
| NOTCH1   | ENST00000277541.6 | notch 1        | 88   | 1 | 0 | 1 |
| EPHA5    | ENST00000273854.3 | EPH recepto    | 48   | 1 | 0 | 0 |
| GEMIN6   | ENST00000409011.1 | gem (nuclear   | 257  | 1 | 0 | 0 |
| FAF1     | ENST00000396153.2 | Fas (TNFRS)    | 428  | 1 | 0 | 0 |
| FAM49A   | ENST00000381323.3 | family with s  | 38   | 1 | 0 | 0 |
| WDR41    | ENST00000296679.4 | WD repeat d    | 313  | 1 | 0 | 0 |
| RHOQ     | ENST00000238738.4 | ras homolog    | 179  | 1 | 0 | 0 |
| GUCY1A3  | ENST00000296518.7 | guanylate cyc  | 42   | 1 | 0 | 0 |
| ZNF138   | ENST00000440598.1 | zinc finger pi | 357  | 1 | 0 | 0 |
| SLC24A3  | ENST00000328041.6 | solute carrier | 63   | 1 | 1 | 0 |
| NETO2    | ENST00000562435.1 | neuropilin (N  | 723  | 1 | 1 | 0 |
| FAM126A  | ENST00000409923.1 | family with s  | 241  | 1 | 0 | 0 |
| MRAS     | ENST00000289104.4 | muscle RAS     | 181  | 1 | 0 | 0 |
| PITPNC1  | ENST00000580974.1 | phosphatidyl   | 797  | 1 | 1 | 0 |
| CBLB     | ENST00000264122.4 | Cbl proto-on   | 469  | 1 | 0 | 0 |
| APPBP2   | ENST00000083182.3 | amyloid beta   | 907  | 1 | 1 | 0 |
| GAB1     | ENST00000262995.4 | GRB2-associ    | 26   | 1 | 0 | 0 |
| MTUS2    | ENST00000431530.3 | microtubule :  | 17   | 1 | 0 | 0 |
| SLC40A1  | ENST00000261024.2 | solute carrier | 25   | 1 | 0 | 0 |
| ZDHHC21  | ENST00000380916.4 | zinc finger, I | 196  | 1 | 0 | 1 |
| DOCK11   | ENST00000276204.6 | dedicator of c | 40   | 1 | 0 | 1 |
| PACS2    | ENST00000447393.1 | phosphofurin   | 234  | 1 | 0 | 1 |
| MBNL3    | ENST00000370839.3 | muscleblind-   | 593  | 1 | 0 | 0 |
| NCAM1    | ENST00000316851.7 | neural cell ac | 19   | 1 | 0 | 0 |
| EPC1     | ENST00000319778.6 | enhancer of p  | 102  | 1 | 0 | 1 |
| TP53INP1 | ENST00000448464.2 | tumor protein  | 39   | 1 | 0 | 0 |
| IRF2BP2  | ENST00000366610.3 | interferon reg | 8690 | 1 | 0 | 0 |
| NUP50    | ENST00000347635.4 | nucleoporin :  | 57   | 1 | 0 | 1 |
| USP51    | ENST00000500968.3 | ubiquitin spe  | 26   | 1 | 0 | 0 |
| MSL2     | ENST00000309993.2 | male-specific  | 175  | 2 | 0 | 1 |
| PCYOX1   | ENST00000264441.5 | prenylcysteir  | 407  | 1 | 0 | 0 |
| SIN3A    | ENST00000394947.3 | SIN3 transcri  | 1142 | 1 | 0 | 0 |
| LGALS    | ENST00000409537.2 | lectin, galact | 334  | 1 | 0 | 0 |
| VGLL4    | ENST00000273038.3 | vestigial like | 37   | 2 | 0 | 0 |
| MSH6     | ENST00000234420.5 | mutS homolc    | 94   | 1 | 1 | 0 |
| KCNQ5    | ENST00000370398.1 | potassium vo   | 50   | 1 | 0 | 1 |
| STMN2    | ENST00000518111.1 | stathmin-like  | 7    | 1 | 0 | 1 |
| SMURF2   | ENST00000262435.9 | SMAD speci     | 978  | 1 | 0 | 0 |

|          |                   |                |      |   |   |   |
|----------|-------------------|----------------|------|---|---|---|
| CUL4B    | ENST00000371322.5 | cullin 4B      | 150  | 1 | 0 | 1 |
| FAM49B   | ENST00000519824.2 | family with s  | 52   | 1 | 0 | 1 |
| MYEF2    | ENST00000324324.7 | myelin expre   | 358  | 1 | 0 | 0 |
| MESDC1   | ENST00000267984.2 | mesoderm de    | 84   | 1 | 0 | 0 |
| SNX13    | ENST00000409389.1 | sorting nexin  | 100  | 1 | 0 | 0 |
| GIGYF2   | ENST00000373566.3 | GRB10 inter    | 361  | 1 | 0 | 1 |
| CFL2     | ENST00000341223.3 | cofilin 2 (mu  | 902  | 1 | 0 | 0 |
| MLLT3    | ENST00000380338.4 | myeloid/lym    | 385  | 1 | 0 | 1 |
| BICD1    | ENST00000548411.1 | bicaudal D h   | 205  | 1 | 0 | 1 |
| ALG6     | ENST00000371108.4 | ALG6, alpha    | 140  | 1 | 0 | 0 |
| MAP2     | ENST00000360351.4 | microtubule-   | 68   | 1 | 0 | 1 |
| RAB3C    | ENST00000282878.4 | RAB3C, mer     | 242  | 1 | 0 | 0 |
| CNKSR3   | ENST00000607772.1 | CNKSR fam      | 567  | 1 | 0 | 0 |
| CDH4     | ENST00000360469.5 | cadherin 4, ty | 33   | 1 | 0 | 0 |
| MAGI1    | ENST00000330909.8 | membrane as    | 258  | 1 | 0 | 1 |
| IPPK     | ENST00000287996.3 | inositol 1,3,4 | 211  | 1 | 0 | 0 |
| ARHGAP19 | ENST00000453547.2 | ARHGAP19       | 15   | 1 | 0 | 0 |
| PTPDC1   | ENST00000375360.3 | protein tyrosi | 46   | 1 | 0 | 1 |
| RSBN1    | ENST00000261441.5 | round sperma   | 54   | 1 | 0 | 0 |
| DENND5A  | ENST00000530044.1 | DENN/MAC       | 294  | 1 | 0 | 0 |
| VANGL1   | ENST00000355485.2 | VANGL plar     | 721  | 1 | 0 | 0 |
| RRAGD    | ENST00000369415.4 | Ras-related C  | 644  | 1 | 0 | 0 |
| PCSK9    | ENST00000302118.5 | proprotein cc  | 2345 | 1 | 0 | 0 |
| ACVR2A   | ENST00000241416.7 | activin A rec  | 109  | 1 | 0 | 0 |
| GATA6    | ENST00000269216.3 | GATA bindi     | 691  | 2 | 0 | 1 |
| NUP43    | ENST00000367403.3 | nucleoporin    | 113  | 1 | 0 | 1 |
| SZT2     | ENST00000562955.1 | seizure thresl | 123  | 1 | 0 | 0 |
| PRPF40A  | ENST00000410080.1 | PRP40 pre-r    | 459  | 1 | 0 | 0 |
| AGO3     | ENST00000373191.4 | argonaute RI   | 198  | 1 | 0 | 1 |
| NR3C2    | ENST00000344721.4 | nuclear recep  | 425  | 1 | 0 | 0 |
| PHF21A   | ENST00000257821.4 | PHD finger p   | 301  | 1 | 0 | 0 |
| DICER1   | ENST00000541352.1 | dicer 1, ribor | 25   | 1 | 0 | 0 |
| DMXL1    | ENST00000311085.8 | Dmx-like 1     | 136  | 1 | 0 | 0 |
| MTDH     | ENST00000336273.3 | metadherin     | 5192 | 1 | 0 | 1 |
| IGSF10   | ENST00000282466.3 | immunoglob     | 191  | 1 | 0 | 0 |
| AGPS     | ENST00000264167.4 | alkylglycerol  | 1610 | 2 | 0 | 1 |
| ELAVL1   | ENST00000407627.2 | ELAV like R    | 2812 | 1 | 0 | 0 |
| STK24    | ENST00000397517.2 | serine/threon  | 486  | 1 | 0 | 1 |
| CLCC1    | ENST00000356970.2 | chloride char  | 849  | 1 | 0 | 0 |
| HIC2     | ENST00000407464.2 | hypermethyl    | 28   | 1 | 0 | 0 |
| CDC37L1  | ENST00000381854.3 | cell division  | 280  | 1 | 0 | 0 |
| RLIM     | ENST00000332687.6 | ring finger pt | 662  | 1 | 0 | 1 |
| GRK5     | ENST00000392870.2 | G protein-co   | 337  | 1 | 0 | 0 |
| HMBOX1   | ENST00000397358.3 | homeobox cc    | 27   | 1 | 0 | 0 |
| HMGB3    | ENST00000325307.7 | high mobility  | 295  | 1 | 0 | 0 |
| HIF1A    | ENST00000323441.6 | hypoxia indu   | 1955 | 1 | 0 | 0 |
| MAP7     | ENST00000354570.3 | microtubule-   | 444  | 1 | 0 | 1 |
| ATP2B2   | ENST00000352432.4 | ATPase, Ca+    | 170  | 1 | 0 | 0 |

|            |                    |                |        |   |   |   |
|------------|--------------------|----------------|--------|---|---|---|
| ELOVL6     | ENST00000394607.3  | ELOVL fatty    | 901    | 1 | 1 | 0 |
| ERO1LB     | ENST00000354619.5  | ERO1-like b    | 478    | 1 | 0 | 0 |
| MED28      | ENST00000237380.7  | mediator con   | 1483   | 1 | 0 | 0 |
| PDCD10     | ENST00000392750.2  | programmed     | 638    | 1 | 0 | 0 |
| MELK       | ENST00000536987.1  | maternal eml   | 5978   | 2 | 0 | 1 |
| RAB11A     | ENST00000569896.1  | RAB11A, m      | 5781   | 1 | 0 | 0 |
| HPS1       | ENST00000361490.4  | Hermansky-I    | 382    | 1 | 0 | 0 |
| HCN1       | ENST00000303230.4  | hyperpolariz   | 5      | 2 | 2 | 0 |
| ZNF281     | ENST00000294740.3  | zinc finger p  | 595    | 1 | 0 | 0 |
| RNF11      | ENST00000242719.3  | ring finger p  | 5881   | 1 | 0 | 1 |
| HMGCR      | ENST00000287936.4  | 3-hydroxy-3-   | 1385   | 1 | 0 | 0 |
| KLF10      | ENST00000285407.6  | Kruppel-like   | 320    | 1 | 0 | 0 |
| FGF10      | ENST00000264664.4  | fibroblast gr  | 5      | 2 | 0 | 1 |
| RSU1       | ENST00000377921.3  | Ras suppress   | 10596  | 1 | 0 | 1 |
| SCAF8      | ENST00000367178.3  | SR-related C   | 1917   | 1 | 0 | 0 |
| TAB3       | ENST00000378933.1  | TGF-beta act   | 201    | 1 | 0 | 1 |
| BCL9L      | ENST00000334801.3  | B-cell CLL/l   | 91     | 1 | 0 | 0 |
| SRSF3      | ENST00000373715.6  | serine/argini  | 2593   | 1 | 1 | 0 |
| CLEC14A    | ENST00000342213.2  | C-type lectin  | 5      | 1 | 0 | 0 |
| CACNG2     | ENST00000300105.6  | calcium chan   | 5      | 1 | 0 | 0 |
| CHST1      | ENST00000308064.2  | carbohydrate   | 5      | 1 | 0 | 0 |
| CSMD1      | ENST00000400186.3  | CUB and Sus    | 5      | 1 | 0 | 0 |
| KDM6A      | ENST00000377967.4  | lysine (K)-sp  | 991    | 1 | 0 | 1 |
| MAPK10     | ENST00000395169.3  | mitogen-acti   | 5      | 1 | 0 | 1 |
| PIK3R5     | ENST00000447110.1  | phosphoinosi   | 5      | 1 | 0 | 0 |
| MYBPC1     | ENST00000392934.3  | myosin bindi   | 5      | 1 | 0 | 0 |
| ABI2       | ENST00000295851.5  | abl-interactor | 877    | 1 | 0 | 0 |
| PTPRF      | ENST00000372414.3  | protein tyrosi | 14842  | 1 | 0 | 1 |
| C16orf45   | ENST00000300006.4  | chromosome     | 60     | 1 | 1 | 0 |
| ANKS1B     | ENST00000546960.1  | ankyrin repe   | 21     | 1 | 0 | 1 |
| MXD4       | ENST00000337190.2  | MAX dimeri     | 1173   | 1 | 1 | 0 |
| NAA50      | ENST00000240922.3  | N(alpha)-ace   | 260    | 1 | 0 | 0 |
| VWA1       | ENST00000338660.5  | von Willebra   | 145    | 1 | 0 | 0 |
| LMF1       | ENST00000262301.11 | lipase matur   | 155    | 1 | 0 | 0 |
| ITGB1BP1   | ENST00000360635.3  | integrin beta  | 14310  | 1 | 0 | 0 |
| RP11-73M18 | ENST00000472726.2  | Kinesin light  | 499    | 2 | 0 | 1 |
| BMF        | ENST00000220446.4  | Bcl2 modifyi   | 179    | 1 | 0 | 0 |
| DOCK7      | ENST00000251157.5  | dedicator of   | 66     | 1 | 0 | 1 |
| RSPO3      | ENST00000356698.4  | R-spondin 3    | 118    | 1 | 0 | 0 |
| DONSON     | ENST00000453626.1  | downstream     | 103    | 1 | 1 | 0 |
| ATP6V1C1   | ENST00000395862.3  | ATPase, H+     | 951    | 1 | 0 | 0 |
| SV2C       | ENST00000502798.2  | synaptic vesi  | 30     | 1 | 0 | 0 |
| ROCK1      | ENST00000399799.2  | Rho-associat   | 7 1*   |   | 0 | 0 |
| SESTD1     | ENST00000428443.3  | SEC14 and s    | 478 1* |   | 0 | 0 |
| PCDHB16    | ENST00000361016.2  | protocadheri   | 36 1*  |   | 0 | 0 |
| KIF5B      | ENST00000302418.4  | kinesin famil  | 635 1* |   | 0 | 0 |
| GPR19      | ENST00000540510.1  | G protein-co   | 12 1*  |   | 0 | 0 |
| KIF3B      | ENST00000375712.3  | kinesin famil  | 182 1* |   | 0 | 0 |

|       |                   |               |        |   |   |
|-------|-------------------|---------------|--------|---|---|
| FMNL3 | ENST00000335154.5 | formin-like 3 | 132 1* | 0 | 0 |
|-------|-------------------|---------------|--------|---|---|

---

**Table S2 miR-458b-5p target genes predicted using miRDB**

| Rank | Score | miRNA name     | Gene symbol | Gene description                                                   |
|------|-------|----------------|-------------|--------------------------------------------------------------------|
| 1    | 98    | gga-miR-458b-5 | RASA2       | RAS p21 protein activator 2                                        |
| 2    | 97    | gga-miR-458b-5 | STK26       | serine/threonine kinase 26                                         |
| 3    | 96    | gga-miR-458b-5 | MON2        | MON2 homolog, regulator of endosome-to-Golgi traffickir            |
| 4    | 96    | gga-miR-458b-5 | LNPBK       | lunapark, ER junction formation factor                             |
| 5    | 96    | gga-miR-458b-5 | STK24       | serine/threonine kinase 24                                         |
| 6    | 95    | gga-miR-458b-5 | CLIC4       | chloride intracellular channel 4                                   |
| 7    | 94    | gga-miR-458b-5 | ZBTB10      | zinc finger and BTB domain containing 10                           |
| 8    | 94    | gga-miR-458b-5 | CTNNA1      | catenin beta 1                                                     |
| 9    | 94    | gga-miR-458b-5 | ARFGAP1     | ADP ribosylation factor guanine nucleotide exchange factc          |
| 10   | 94    | gga-miR-458b-5 | BCL9        | B-cell CLL/lymphoma 9                                              |
| 11   | 94    | gga-miR-458b-5 | PHIP        | pleckstrin homology domain interacting protein                     |
| 12   | 93    | gga-miR-458b-5 | DPEP2       | dipeptidase 2                                                      |
| 13   | 93    | gga-miR-458b-5 | RAB11FIP2   | RAB11 family interacting protein 2                                 |
| 14   | 93    | gga-miR-458b-5 | BICC1       | BicC family RNA binding protein 1                                  |
| 15   | 92    | gga-miR-458b-5 | BRD1        | bromodomain containing 1                                           |
| 16   | 92    | gga-miR-458b-5 | RNF111      | ring finger protein 111                                            |
| 17   | 92    | gga-miR-458b-5 | TXLNG       | taxilin gamma                                                      |
| 18   | 92    | gga-miR-458b-5 | CACHD1      | cache domain containing 1                                          |
| 19   | 92    | gga-miR-458b-5 | ATP1B3      | ATPase Na <sup>+</sup> /K <sup>+</sup> transporting subunit beta 3 |
| 20   | 91    | gga-miR-458b-5 | PHTF2       | putative homeodomain transcription factor 2                        |
| 21   | 91    | gga-miR-458b-5 | ITPR1L2     | inositol 1,4,5-trisphosphate receptor interacting protein like     |
| 22   | 90    | gga-miR-458b-5 | SRSF3       | serine and arginine rich splicing factor 3                         |
| 23   | 90    | gga-miR-458b-5 | FAM49B      | family with sequence similarity 49 member B                        |
| 24   | 90    | gga-miR-458b-5 | AHSA2P      | activator of HSP90 ATPase homolog 2, pseudogene                    |
| 25   | 90    | gga-miR-458b-5 | SRGAP3      | SLIT-ROBO Rho GTPase activating protein 3                          |
| 26   | 90    | gga-miR-458b-5 | PTPN12      | protein tyrosine phosphatase, non-receptor type 12                 |
| 27   | 89    | gga-miR-458b-5 | CARF        | calcium responsive transcription factor                            |
| 28   | 89    | gga-miR-458b-5 | DPYSL3      | dihydropyrimidinase like 3                                         |
| 29   | 89    | gga-miR-458b-5 | UFSP2       | UFM1 specific peptidase 2                                          |
| 30   | 89    | gga-miR-458b-5 | SUZ12       | SUZ12, polycomb repressive complex 2 subunit                       |
| 31   | 89    | gga-miR-458b-5 | TBX4        | T-box 4                                                            |
| 32   | 89    | gga-miR-458b-5 | VPS54       | VPS54, GARP complex subunit                                        |
| 33   | 88    | gga-miR-458b-5 | UPB1        | beta-ureidopropionase 1                                            |
| 34   | 88    | gga-miR-458b-5 | GAB2        | GRB2 associated binding protein 2                                  |
| 35   | 88    | gga-miR-458b-5 | GRIK2       | glutamate ionotropic receptor kainate type subunit 2               |
| 36   | 88    | gga-miR-458b-5 | SMAD5       | SMAD family member 5                                               |
| 37   | 88    | gga-miR-458b-5 | STRBP       | spermatid perinuclear RNA binding protein                          |
| 38   | 88    | gga-miR-458b-5 | FOXO3       | forkhead box O3                                                    |
| 39   | 88    | gga-miR-458b-5 | TRAF3       | TNF receptor associated factor 3                                   |
| 40   | 88    | gga-miR-458b-5 | OSBP2       | oxysterol binding protein 2                                        |
| 41   | 87    | gga-miR-458b-5 | CDH2        | cadherin 2                                                         |
| 42   | 87    | gga-miR-458b-5 | SNAP91      | synaptosome associated protein 91                                  |
| 43   | 87    | gga-miR-458b-5 | PARD3       | par-3 family cell polarity regulator                               |
| 44   | 86    | gga-miR-458b-5 | TOMM34      | translocase of outer mitochondrial membrane 34                     |
| 45   | 86    | gga-miR-458b-5 | KLHL23      | kelch like family member 23                                        |
| 46   | 86    | gga-miR-458b-5 | PDPK1       | 3-phosphoinositide dependent protein kinase 1                      |

|    |    |                        |                                                                      |
|----|----|------------------------|----------------------------------------------------------------------|
| 47 | 85 | gga-miR-458b-5 FAM102B | family with sequence similarity 102 member B                         |
| 48 | 85 | gga-miR-458b-5 ELOVL6  | ELOVL fatty acid elongase 6                                          |
| 49 | 85 | gga-miR-458b-5 ANKS1B  | ankyrin repeat and sterile alpha motif domain containing 11          |
| 50 | 85 | gga-miR-458b-5 PSMD6   | proteasome 26S subunit, non-ATPase 6                                 |
| 51 | 85 | gga-miR-458b-5 AUH     | AU RNA binding methylglutaconyl-CoA hydratase                        |
| 52 | 84 | gga-miR-458b-5 ECT2    | epithelial cell transforming 2                                       |
| 53 | 84 | gga-miR-458b-5 BAG1    | BCL2 associated athanogene 1                                         |
| 54 | 84 | gga-miR-458b-5 LHX9    | LIM homeobox 9                                                       |
| 55 | 84 | gga-miR-458b-5 GNA13   | G protein subunit alpha 13                                           |
| 56 | 83 | gga-miR-458b-5 OTX2    | orthodenticle homeobox 2                                             |
| 57 | 83 | gga-miR-458b-5 MLEC    | malectin                                                             |
| 58 | 83 | gga-miR-458b-5 ZNF367  | zinc finger protein 367                                              |
| 59 | 83 | gga-miR-458b-5 KLHL34  | kelch like family member 34                                          |
| 60 | 83 | gga-miR-458b-5 NF1     | neurofibromin 1                                                      |
| 61 | 83 | gga-miR-458b-5 MESD    | mesoderm development LRP chaperone                                   |
| 62 | 82 | gga-miR-458b-5 GRM7    | glutamate metabotropic receptor 7                                    |
| 63 | 82 | gga-miR-458b-5 FMR1    | fragile X mental retardation 1                                       |
| 64 | 82 | gga-miR-458b-5 ANKIB1  | ankyrin repeat and IBR domain containing 1                           |
| 65 | 82 | gga-miR-458b-5 CLTCL1  | clathrin, heavy chain-like 1                                         |
| 66 | 82 | gga-miR-458b-5 UBA6    | ubiquitin like modifier activating enzyme 6                          |
| 67 | 82 | gga-miR-458b-5 CERS5   | ceramide synthase 5                                                  |
| 68 | 82 | gga-miR-458b-5 CNOT8   | CCR4-NOT transcription complex subunit 8                             |
| 69 | 81 | gga-miR-458b-5 DNMT3A  | DNA methyltransferase 3A                                             |
| 70 | 81 | gga-miR-458b-5 PPM1E   | protein phosphatase, Mg <sup>2+</sup> /Mn <sup>2+</sup> dependent 1E |
| 71 | 80 | gga-miR-458b-5 NT5C2   | 5'-nucleotidase, cytosolic II                                        |
| 72 | 80 | gga-miR-458b-5 LMNA    | lamin-L(III)-like                                                    |
| 73 | 80 | gga-miR-458b-5 ARL8B   | ADP ribosylation factor like GTPase 8B                               |
| 74 | 79 | gga-miR-458b-5 EIF4E   | eukaryotic translation initiation factor 4E                          |
| 75 | 79 | gga-miR-458b-5 HSPA4L  | heat shock protein family A (Hsp70) member 4 like                    |
| 76 | 79 | gga-miR-458b-5 BCORL1  | BCL6 corepressor like 1                                              |
| 77 | 78 | gga-miR-458b-5 SH3D19  | SH3 domain containing 19                                             |
| 78 | 78 | gga-miR-458b-5 IPPK    | inositol-pentakisphosphate 2-kinase                                  |
| 79 | 78 | gga-miR-458b-5 STK39   | serine/threonine kinase 39                                           |
| 80 | 77 | gga-miR-458b-5 PPFIA1  | PTPRF interacting protein alpha 1                                    |
| 81 | 77 | gga-miR-458b-5 RDH7L   | retinol dehydrogenase 7-like                                         |
| 82 | 77 | gga-miR-458b-5 SMARCA1 | SWI/SNF related, matrix associated, actin dependent regul            |
| 83 | 77 | gga-miR-458b-5 AHSG    | alpha 2-HS glycoprotein                                              |
| 84 | 77 | gga-miR-458b-5 CDCA2   | cell division cycle associated 2                                     |
| 85 | 77 | gga-miR-458b-5 ADAMTS6 | ADAM metalloproteinase with thrombospondin type 1 moti               |
| 86 | 77 | gga-miR-458b-5 P4HA1   | prolyl 4-hydroxylase subunit alpha 1                                 |
| 87 | 76 | gga-miR-458b-5 BBX     | BBX, HMG-box containing                                              |
| 88 | 76 | gga-miR-458b-5 TTC21B  | tetratricopeptide repeat domain 21B                                  |
| 89 | 76 | gga-miR-458b-5 TBL1XR1 | transducin beta like 1 X-linked receptor 1                           |
| 90 | 76 | gga-miR-458b-5 BEND6   | BEN domain containing 6                                              |
| 91 | 76 | gga-miR-458b-5 MYT1L   | myelin transcription factor 1 like                                   |
| 92 | 76 | gga-miR-458b-5 GUCY2F  | guanylate cyclase 2F, retinal                                        |
| 93 | 76 | gga-miR-458b-5 SLITRK6 | SLIT and NTRK like family member 6                                   |
| 94 | 76 | gga-miR-458b-5 APOBEC2 | apolipoprotein B mRNA editing enzyme catalytic subunit 2             |



|     |    |                           |                                                             |
|-----|----|---------------------------|-------------------------------------------------------------|
| 95  | 76 | gga-miR-458b-5 LDLRAD4    | low density lipoprotein receptor class A domain containing  |
| 96  | 75 | gga-miR-458b-5 DPT        | dermatopontin                                               |
| 97  | 75 | gga-miR-458b-5 PCDH10     | protocadherin 10                                            |
| 98  | 75 | gga-miR-458b-5 REV3L      | REV3 like, DNA directed polymerase zeta catalytic subuni    |
| 99  | 75 | gga-miR-458b-5 GID8       | GID complex subunit 8 homolog                               |
| 100 | 75 | gga-miR-458b-5 ANKRD44    | ankyrin repeat domain 44                                    |
| 101 | 75 | gga-miR-458b-5 BRD3       | bromodomain containing 3                                    |
| 102 | 74 | gga-miR-458b-5 FAIM       | Fas apoptotic inhibitory molecule                           |
| 103 | 74 | gga-miR-458b-5 PTPRF      | protein tyrosine phosphatase, receptor type F               |
| 104 | 74 | gga-miR-458b-5 RASSF2     | Ras association domain family member 2                      |
| 105 | 74 | gga-miR-458b-5 LAMA5      | laminin subunit alpha 5                                     |
| 106 | 74 | gga-miR-458b-5 SLF2       | SMC5-SMC6 complex localization factor 2                     |
| 107 | 73 | gga-miR-458b-5 DCBLD2     | discoidin, CUB and LCCL domain containing 2                 |
| 108 | 73 | gga-miR-458b-5 SUSD6      | sushi domain containing 6                                   |
| 109 | 73 | gga-miR-458b-5 TWSG1      | twisted gastrulation BMP signaling modulator 1              |
| 110 | 73 | gga-miR-458b-5 LOC422051  | zinc finger protein 91-like                                 |
| 111 | 73 | gga-miR-458b-5 KLHL20     | kelch like family member 20                                 |
| 112 | 73 | gga-miR-458b-5 ARHGAP12   | Rho GTPase activating protein 12                            |
| 113 | 72 | gga-miR-458b-5 FCHO2      | FCH domain only 2                                           |
| 114 | 72 | gga-miR-458b-5 HMG5       | high mobility group nucleosome binding domain 5             |
| 115 | 72 | gga-miR-458b-5 FBXO45     | F-box protein 45                                            |
| 116 | 72 | gga-miR-458b-5 BRWD3      | bromodomain and WD repeat domain containing 3               |
| 117 | 72 | gga-miR-458b-5 SCNN1D     | sodium channel epithelial 1 delta subunit                   |
| 118 | 72 | gga-miR-458b-5 ABCC3      | ATP binding cassette subfamily C member 3                   |
| 119 | 72 | gga-miR-458b-5 ZNF512     | zinc finger protein 512                                     |
| 120 | 72 | gga-miR-458b-5 RASA3      | RAS p21 protein activator 3                                 |
| 121 | 72 | gga-miR-458b-5 SMYD3      | SET and MYND domain containing 3                            |
| 122 | 71 | gga-miR-458b-5 VCL        | vinculin                                                    |
| 123 | 71 | gga-miR-458b-5 DENND4A    | DENN domain containing 4A                                   |
| 124 | 71 | gga-miR-458b-5 PHF21B     | PHD finger protein 21B                                      |
| 125 | 71 | gga-miR-458b-5 DR1        | down-regulator of transcription 1                           |
| 126 | 70 | gga-miR-458b-5 STT3B      | STT3B, catalytic subunit of the oligosaccharyltransferase c |
| 127 | 70 | gga-miR-458b-5 LOC420294  | cylindromatosis-like                                        |
| 128 | 70 | gga-miR-458b-5 DIAPH2     | diaphanous related formin 2                                 |
| 129 | 70 | gga-miR-458b-5 ZBTB38     | zinc finger and BTB domain containing 38                    |
| 130 | 70 | gga-miR-458b-5 SOWAHC     | soosondowah ankyrin repeat domain family member C           |
| 131 | 69 | gga-miR-458b-5 XYLT1      | xylosyltransferase 1                                        |
| 132 | 69 | gga-miR-458b-5 CDR2       | cerebellar degeneration related protein 2                   |
| 133 | 69 | gga-miR-458b-5 PLCXD3     | phosphatidylinositol specific phospholipase C X domain c    |
| 134 | 69 | gga-miR-458b-5 KDM1B      | lysine demethylase 1B                                       |
| 135 | 69 | gga-miR-458b-5 COG3       | component of oligomeric golgi complex 3                     |
| 136 | 69 | gga-miR-458b-5 PALLD      | palladin, cytoskeletal associated protein                   |
| 137 | 69 | gga-miR-458b-5 SYTL3      | synaptotagmin like 3                                        |
| 138 | 69 | gga-miR-458b-5 C4HCXorf57 | chromosome 4 CXorf57 homolog                                |
| 139 | 69 | gga-miR-458b-5 SREK1      | splicing regulatory glutamic acid and lysine rich protein 1 |
| 140 | 69 | gga-miR-458b-5 ARL4A      | ADP ribosylation factor like GTPase 4A                      |
| 141 | 68 | gga-miR-458b-5 TMEM263    | transmembrane protein 263                                   |
| 142 | 68 | gga-miR-458b-5 PIK3C2G    | phosphatidylinositol-4-phosphate 3-kinase catalytic subuni  |

|     |    |                          |                                                                      |
|-----|----|--------------------------|----------------------------------------------------------------------|
| 143 | 68 | gga-miR-458b-5 MET       | MET proto-oncogene, receptor tyrosine kinase                         |
| 144 | 68 | gga-miR-458b-5 TNPO1     | transportin 1                                                        |
| 145 | 68 | gga-miR-458b-5 FAM49A    | family with sequence similarity 49 member A                          |
| 146 | 68 | gga-miR-458b-5 EPHX1     | epoxide hydrolase 1                                                  |
| 147 | 68 | gga-miR-458b-5 POU2F1    | POU class 2 homeobox 1                                               |
| 148 | 68 | gga-miR-458b-5 TSC1      | TSC complex subunit 1                                                |
| 149 | 68 | gga-miR-458b-5 SNX13     | sorting nexin 13                                                     |
| 150 | 67 | gga-miR-458b-5 LIN28B    | lin-28 homolog B                                                     |
| 151 | 67 | gga-miR-458b-5 SLC9A3    | solute carrier family 9 member A3                                    |
| 152 | 67 | gga-miR-458b-5 NOVA1     | uncharacterized LOC423300                                            |
| 153 | 67 | gga-miR-458b-5 FREM3     | FRAS1 related extracellular matrix 3                                 |
| 154 | 67 | gga-miR-458b-5 GDE1      | glycerophosphodiester phosphodiesterase 1                            |
| 155 | 67 | gga-miR-458b-5 IMPG2     | interphotoreceptor matrix proteoglycan 2                             |
| 156 | 67 | gga-miR-458b-5 ALCAM     | activated leukocyte cell adhesion molecule                           |
| 157 | 66 | gga-miR-458b-5 NUBP2     | nucleotide binding protein 2                                         |
| 158 | 66 | gga-miR-458b-5 SPRY3     | sprouty RTK signaling antagonist 3                                   |
| 159 | 66 | gga-miR-458b-5 C9ORF152  | chromosome 2 open reading frame, human C9orf152                      |
| 160 | 66 | gga-miR-458b-5 MCMBP     | minichromosome maintenance complex binding protein                   |
| 161 | 66 | gga-miR-458b-5 SMARCA2   | SWI/SNF related, matrix associated, actin dependent regul.           |
| 162 | 66 | gga-miR-458b-5 DOCK6     | dedicator of cytokinesis 6                                           |
| 163 | 66 | gga-miR-458b-5 CUL4B     | cullin 4B                                                            |
| 164 | 66 | gga-miR-458b-5 CECR5     | cat eye syndrome chromosome region, candidate 5                      |
| 165 | 66 | gga-miR-458b-5 BIRC6     | baculoviral IAP repeat containing 6                                  |
| 166 | 66 | gga-miR-458b-5 CEBPD     | CCAAT enhancer binding protein delta                                 |
| 167 | 65 | gga-miR-458b-5 PITPNC1   | phosphatidylinositol transfer protein, cytoplasmic 1                 |
| 168 | 65 | gga-miR-458b-5 KIF13A    | kinesin family member 13A                                            |
| 169 | 65 | gga-miR-458b-5 BICD2     | BICD cargo adaptor 2                                                 |
| 170 | 65 | gga-miR-458b-5 NETO2     | neuropilin and tolloid like 2                                        |
| 171 | 65 | gga-miR-458b-5 GPT       | glutamic--pyruvic transaminase                                       |
| 172 | 65 | gga-miR-458b-5 CLOCK     | clock circadian regulator                                            |
| 173 | 65 | gga-miR-458b-5 NARF      | nuclear prelamin A recognition factor                                |
| 174 | 64 | gga-miR-458b-5 RAD23B    | RAD23 homolog B, nucleotide excision repair protein                  |
| 175 | 64 | gga-miR-458b-5 SSBP2     | single stranded DNA binding protein 2                                |
| 176 | 64 | gga-miR-458b-5 EIF6      | eukaryotic translation initiation factor 6                           |
| 177 | 64 | gga-miR-458b-5 SLC22A15  | solute carrier family 22 member 15                                   |
| 178 | 64 | gga-miR-458b-5 FGF10     | fibroblast growth factor 10                                          |
| 179 | 64 | gga-miR-458b-5 CUX2      | cut like homeobox 2                                                  |
| 180 | 63 | gga-miR-458b-5 GPR107    | G protein-coupled receptor 107                                       |
| 181 | 63 | gga-miR-458b-5 IBTK      | inhibitor of Bruton tyrosine kinase                                  |
| 182 | 63 | gga-miR-458b-5 HS1BP3    | HCLS1 binding protein 3                                              |
| 183 | 63 | gga-miR-458b-5 BCL7A     | BCL tumor suppressor 7A                                              |
| 184 | 63 | gga-miR-458b-5 PPM1L     | protein phosphatase, Mg <sup>2+</sup> /Mn <sup>2+</sup> dependent 1L |
| 185 | 63 | gga-miR-458b-5 ZNF217L   | zinc finger protein 217-like                                         |
| 186 | 63 | gga-miR-458b-5 MTDH      | metadherin                                                           |
| 187 | 63 | gga-miR-458b-5 MYO16     | myosin XVI                                                           |
| 188 | 63 | gga-miR-458b-5 SDC1      | syndecan 1                                                           |
| 189 | 63 | gga-miR-458b-5 LOC429054 | protein FAM102B-like                                                 |
| 190 | 63 | gga-miR-458b-5 SHB       | SH2 domain containing adaptor protein B                              |

|     |    |                         |                                                        |
|-----|----|-------------------------|--------------------------------------------------------|
| 191 | 62 | gga-miR-458b-5 EGLN3    | egl-9 family hypoxia inducible factor 3                |
| 192 | 62 | gga-miR-458b-5 TMEM70   | transmembrane protein 70                               |
| 193 | 62 | gga-miR-458b-5 TCP11L2  | t-complex 11 like 2                                    |
| 194 | 62 | gga-miR-458b-5 RTKN2    | rhotekin 2                                             |
| 195 | 62 | gga-miR-458b-5 DLC1     | DLC1 Rho GTPase activating protein                     |
| 196 | 62 | gga-miR-458b-5 VDAC2    | voltage dependent anion channel 2                      |
| 197 | 62 | gga-miR-458b-5 B3GAT1L  | beta-1,3-glucuronyltransferase 1-like                  |
| 198 | 62 | gga-miR-458b-5 SCN3B    | sodium voltage-gated channel beta subunit 3            |
| 199 | 61 | gga-miR-458b-5 TEAD1    | TEA domain transcription factor 1                      |
| 200 | 61 | gga-miR-458b-5 SGPL1    | sphingosine-1-phosphate lyase 1                        |
| 201 | 61 | gga-miR-458b-5 FXN      | frataxin                                               |
| 202 | 61 | gga-miR-458b-5 BEST1    | bestrophin 1                                           |
| 203 | 61 | gga-miR-458b-5 SALL3    | spalt like transcription factor 3                      |
| 204 | 61 | gga-miR-458b-5 PLXNA1   | plexin A1                                              |
| 205 | 61 | gga-miR-458b-5 SLC33A1  | solute carrier family 33 member 1                      |
| 206 | 61 | gga-miR-458b-5 CD99     | CD99 molecule (Xg blood group)                         |
| 207 | 60 | gga-miR-458b-5 TMEM200A | transmembrane protein 200A                             |
| 208 | 60 | gga-miR-458b-5 NFAM1    | NFAT activating protein with ITAM motif 1              |
| 209 | 60 | gga-miR-458b-5 LHFPL6   | LHFPL tetraspan subfamily member 6                     |
| 210 | 60 | gga-miR-458b-5 EP300    | E1A binding protein p300                               |
| 211 | 60 | gga-miR-458b-5 PCNP     | PEST proteolytic signal containing nuclear protein     |
| 212 | 60 | gga-miR-458b-5 SHQ1     | SHQ1, H/ACA ribonucleoprotein assembly factor          |
| 213 | 60 | gga-miR-458b-5 SERTAD2  | SERTA domain containing 2                              |
| 214 | 60 | gga-miR-458b-5 E4F1     | E4F transcription factor 1                             |
| 215 | 60 | gga-miR-458b-5 ITPK1    | inositol-tetrakisphosphate 1-kinase                    |
| 216 | 60 | gga-miR-458b-5 SBK2     | SH3 domain binding kinase family member 2              |
| 217 | 60 | gga-miR-458b-5 UNC5D    | unc-5 netrin receptor D                                |
| 218 | 60 | gga-miR-458b-5 PTN      | pleiotrophin                                           |
| 219 | 60 | gga-miR-458b-5 CBR1     | carbonyl reductase 1                                   |
| 220 | 59 | gga-miR-458b-5 IRS4     | insulin receptor substrate 4                           |
| 221 | 59 | gga-miR-458b-5 ATP23    | ATP23 metallopeptidase and ATP synthase assembly facto |
| 222 | 59 | gga-miR-458b-5 LRIG1    | leucine rich repeats and immunoglobulin like domains 1 |
| 223 | 59 | gga-miR-458b-5 EVL      | Enah/Vasp-like                                         |
| 224 | 59 | gga-miR-458b-5 ZNF148   | zinc finger protein 148                                |
| 225 | 59 | gga-miR-458b-5 KIAA0319 | KIAA0319                                               |
| 226 | 59 | gga-miR-458b-5 GJD4     | gap junction protein delta 4                           |
| 227 | 59 | gga-miR-458b-5 MSL2     | male-specific lethal 2 homolog (Drosophila)            |
| 228 | 58 | gga-miR-458b-5 SOX5     | SRY-box 5                                              |
| 229 | 58 | gga-miR-458b-5 CLVS1    | clavesin 1                                             |
| 230 | 58 | gga-miR-458b-5 FOXK1    | forkhead box K1                                        |
| 231 | 58 | gga-miR-458b-5 LYN      | LYN proto-oncogene, Src family tyrosine kinase         |
| 232 | 58 | gga-miR-458b-5 KCNQ3    | potassium voltage-gated channel subfamily Q member 3   |
| 233 | 58 | gga-miR-458b-5 PITPNM3  | PITPNM family member 3                                 |
| 234 | 58 | gga-miR-458b-5 CNKSR2L  | connector enhancer of kinase suppressor of Ras 2-like  |
| 235 | 58 | gga-miR-458b-5 XRN1     | 5'-3' exoribonuclease 1                                |
| 236 | 58 | gga-miR-458b-5 CTGF     | connective tissue growth factor                        |
| 237 | 58 | gga-miR-458b-5 PYGO1    | pygopus family PHD finger 1                            |
| 238 | 58 | gga-miR-458b-5 SUMO1    | small ubiquitin-like modifier 1                        |

|     |    |                          |                                                                    |
|-----|----|--------------------------|--------------------------------------------------------------------|
| 239 | 58 | gga-miR-458b-5 TIMM23B   | translocase of inner mitochondrial membrane 23 homolog 1           |
| 240 | 58 | gga-miR-458b-5 VWA3A     | von Willebrand factor A domain containing 3A                       |
| 241 | 58 | gga-miR-458b-5 LUC7L3    | LUC7 like 3 pre-mRNA splicing factor                               |
| 242 | 58 | gga-miR-458b-5 PAFAH1B1  | platelet activating factor acetylhydrolase 1b regulatory subunit 1 |
| 243 | 58 | gga-miR-458b-5 KCNJ8     | potassium voltage-gated channel subfamily J member 8               |
| 244 | 57 | gga-miR-458b-5 LMNB2     | lamin B2                                                           |
| 245 | 57 | gga-miR-458b-5 PTCHD4    | patched domain containing 4                                        |
| 246 | 57 | gga-miR-458b-5 NIN       | ninein                                                             |
| 247 | 57 | gga-miR-458b-5 MRV11     | murine retrovirus integration site 1 homolog                       |
| 248 | 57 | gga-miR-458b-5 ATP2B4    | ATPase plasma membrane Ca <sup>2+</sup> transporting 4             |
| 249 | 57 | gga-miR-458b-5 SLC12A2   | solute carrier family 12 member 2                                  |
| 250 | 57 | gga-miR-458b-5 E2F3      | E2F transcription factor 3                                         |
| 251 | 57 | gga-miR-458b-5 HOMER1    | homer scaffolding protein 1                                        |
| 252 | 57 | gga-miR-458b-5 COA5      | cytochrome c oxidase assembly factor 5                             |
| 253 | 57 | gga-miR-458b-5 GAB3      | GRB2 associated binding protein 3                                  |
| 254 | 57 | gga-miR-458b-5 VPS13A    | vacuolar protein sorting 13 homolog A                              |
| 255 | 57 | gga-miR-458b-5 INPP5E    | inositol polyphosphate-5-phosphatase E                             |
| 256 | 57 | gga-miR-458b-5 PPCS      | phosphopantothienoylcysteine synthetase                            |
| 257 | 56 | gga-miR-458b-5 ANGPT2    | angiopoietin 2                                                     |
| 258 | 56 | gga-miR-458b-5 MAP3K7    | mitogen-activated protein kinase kinase kinase 7                   |
| 259 | 56 | gga-miR-458b-5 RPH3A     | rabphilin 3A                                                       |
| 260 | 56 | gga-miR-458b-5 TMEM177   | transmembrane protein 177                                          |
| 261 | 56 | gga-miR-458b-5 PCSK7     | proprotein convertase subtilisin/kexin type 7                      |
| 262 | 56 | gga-miR-458b-5 ADAMTS18  | ADAM metalloproteinase with thrombospondin type 1 motifs 18        |
| 263 | 56 | gga-miR-458b-5 OFCC1     | orofacial cleft 1 candidate 1                                      |
| 264 | 56 | gga-miR-458b-5 ANKRD46   | ankyrin repeat domain 46                                           |
| 265 | 56 | gga-miR-458b-5 DKK2      | dickkopf WNT signaling pathway inhibitor 2                         |
| 266 | 56 | gga-miR-458b-5 NPHP3     | nephrocystin 3                                                     |
| 267 | 55 | gga-miR-458b-5 SGO2      | shugoshin 2                                                        |
| 268 | 55 | gga-miR-458b-5 GMSRAL    | granulocyte-macrophage colony-stimulating factor receptor-like 1   |
| 269 | 55 | gga-miR-458b-5 MMP16     | matrix metalloproteinase 16                                        |
| 270 | 55 | gga-miR-458b-5 ADIPOQ    | adiponectin, C1Q and collagen domain containing                    |
| 271 | 55 | gga-miR-458b-5 SLC8A1    | solute carrier family 8 member A1                                  |
| 272 | 55 | gga-miR-458b-5 BEGAIN    | brain enriched guanylate kinase associated                         |
| 273 | 55 | gga-miR-458b-5 CCDC14    | coiled-coil domain containing 14                                   |
| 274 | 55 | gga-miR-458b-5 AGPAT2    | 1-acylglycerol-3-phosphate O-acyltransferase 2                     |
| 275 | 55 | gga-miR-458b-5 USP25     | ubiquitin specific peptidase 25                                    |
| 276 | 55 | gga-miR-458b-5 ELOVL4    | ELOVL fatty acid elongase 4                                        |
| 277 | 55 | gga-miR-458b-5 WWC2      | WW and C2 domain containing 2                                      |
| 278 | 54 | gga-miR-458b-5 DCLK1     | doublecortin like kinase 1                                         |
| 279 | 54 | gga-miR-458b-5 ZNF608    | zinc finger protein 608                                            |
| 280 | 54 | gga-miR-458b-5 WDR44     | WD repeat domain 44                                                |
| 281 | 54 | gga-miR-458b-5 CSGALNAC1 | chondroitin sulfate N-acetylgalactosaminyltransferase 2            |
| 282 | 54 | gga-miR-458b-5 SAMD9L    | sterile alpha motif domain containing 9 like                       |
| 283 | 54 | gga-miR-458b-5 SLC24A3   | solute carrier family 24 member 3                                  |
| 284 | 53 | gga-miR-458b-5 GPR141    | G protein-coupled receptor 141                                     |
| 285 | 53 | gga-miR-458b-5 TMEM33    | transmembrane protein 33                                           |
| 286 | 53 | gga-miR-458b-5 CRISP2    | cysteine rich secretory protein 2                                  |

|     |    |                           |                                                             |
|-----|----|---------------------------|-------------------------------------------------------------|
| 287 | 53 | gga-miR-458b-5 HPS5       | HPS5, biogenesis of lysosomal organelles complex 2 subu     |
| 288 | 53 | gga-miR-458b-5 DENND3     | DENN domain containing 3                                    |
| 289 | 53 | gga-miR-458b-5 FRS2       | fibroblast growth factor receptor substrate 2               |
| 290 | 53 | gga-miR-458b-5 EDMTF4     | epidermal differentiation protein starting with MTF motif 4 |
| 291 | 53 | gga-miR-458b-5 ARHGAP18   | Rho GTPase activating protein 18                            |
| 292 | 53 | gga-miR-458b-5 MANBA      | mannosidase beta                                            |
| 293 | 53 | gga-miR-458b-5 SEMA3C     | semaphorin 3C                                               |
| 294 | 52 | gga-miR-458b-5 KCNMA1     | potassium calcium-activated channel subfamily M alpha 1     |
| 295 | 52 | gga-miR-458b-5 C8H1orf123 | chromosome 8 C1orf123 homolog                               |
| 296 | 52 | gga-miR-458b-5 COPE       | coatomer protein complex subunit epsilon                    |
| 297 | 52 | gga-miR-458b-5 ANKRD13A   | ankyrin repeat domain 13A                                   |
| 298 | 52 | gga-miR-458b-5 SLC35E1    | solute carrier family 35 member E1                          |
| 299 | 52 | gga-miR-458b-5 TXNDC5     | thioredoxin domain containing 5                             |
| 300 | 52 | gga-miR-458b-5 SHC3       | SHC adaptor protein 3                                       |
| 301 | 52 | gga-miR-458b-5 PPHLN1     | periphilin 1                                                |
| 302 | 52 | gga-miR-458b-5 CNTN1      | contactin 1                                                 |
| 303 | 51 | gga-miR-458b-5 FGB        | fibrinogen beta chain                                       |
| 304 | 51 | gga-miR-458b-5 LOC1008581 | trichohyalin-like                                           |
| 305 | 51 | gga-miR-458b-5 BYSL       | bystin like                                                 |
| 306 | 51 | gga-miR-458b-5 DOK6       | docking protein 6                                           |
| 307 | 51 | gga-miR-458b-5 ZCCHC24    | zinc finger CCHC-type containing 24                         |
| 308 | 51 | gga-miR-458b-5 IRAK2      | interleukin 1 receptor associated kinase 2                  |
| 309 | 51 | gga-miR-458b-5 ZBTB5      | zinc finger and BTB domain containing 5                     |
| 310 | 50 | gga-miR-458b-5 ATXN1      | ataxin 1                                                    |
| 311 | 50 | gga-miR-458b-5 KLHL2      | kelch like family member 2                                  |
| 312 | 50 | gga-miR-458b-5 PCDH9      | protocadherin 9                                             |
| 313 | 50 | gga-miR-458b-5 FOXP3      | forkhead box P3                                             |
| 314 | 50 | gga-miR-458b-5 THL        | tyrosine hydroxylase-like                                   |

---

**Table S3 miR-458b-5p target genes predicted both by TargetScan and miRDB**

| <b>Rank</b> | <b>Score</b> | <b>miRNA name</b> | <b>Gene symbol</b> | <b>Gene description</b>                                              |
|-------------|--------------|-------------------|--------------------|----------------------------------------------------------------------|
| 1           | 98           | gga-miR-458b-5p   | RASA2              | RAS p21 protein activator 2                                          |
| 2           | 96           | gga-miR-458b-5p   | MON2               | MON2 homolog, regulator of endosome-to-Golgi trafficking             |
| 3           | 96           | gga-miR-458b-5p   | STK24              | serine/threonine kinase 24                                           |
| 4           | 95           | gga-miR-458b-5p   | CLIC4              | chloride intracellular channel 4                                     |
| 5           | 94           | gga-miR-458b-5p   | CTNNB1             | catenin beta 1                                                       |
| 6           | 94           | gga-miR-458b-5p   | ZBTB10             | zinc finger and BTB domain containing 10                             |
| 7           | 94           | gga-miR-458b-5p   | ARFGEF1            | ADP ribosylation factor guanine nucleotide exchange factor 1         |
| 8           | 94           | gga-miR-458b-5p   | BCL9               | B-cell CLL/lymphoma 9                                                |
| 9           | 94           | gga-miR-458b-5p   | PHIP               | pleckstrin homology domain interacting protein                       |
| 10          | 93           | gga-miR-458b-5p   | RAB11FIP2          | RAB11 family interacting protein 2                                   |
| 11          | 93           | gga-miR-458b-5p   | BICC1              | BicC family RNA binding protein 1                                    |
| 12          | 92           | gga-miR-458b-5p   | BRD1               | bromodomain containing 1                                             |
| 13          | 92           | gga-miR-458b-5p   | RNF111             | ring finger protein 111                                              |
| 14          | 92           | gga-miR-458b-5p   | TXLNG              | taxilin gamma                                                        |
| 15          | 92           | gga-miR-458b-5p   | CACHD1             | cache domain containing 1                                            |
| 16          | 92           | gga-miR-458b-5p   | ATP1B3             | ATPase Na <sup>+</sup> /K <sup>+</sup> transporting subunit beta 3   |
| 17          | 91           | gga-miR-458b-5p   | PHTF2              | putative homeodomain transcription factor 2                          |
| 18          | 90           | gga-miR-458b-5p   | SRSF3              | serine and arginine rich splicing factor 3                           |
| 19          | 90           | gga-miR-458b-5p   | FAM49B             | family with sequence similarity 49 member B                          |
| 20          | 90           | gga-miR-458b-5p   | PTPN12             | protein tyrosine phosphatase, non-receptor type 12                   |
| 21          | 89           | gga-miR-458b-5p   | CARF               | calcium responsive transcription factor                              |
| 22          | 89           | gga-miR-458b-5p   | DPYSL3             | dihydropyrimidinase like 3                                           |
| 23          | 89           | gga-miR-458b-5p   | SUZ12              | SUZ12, polycomb repressive complex 2 subunit                         |
| 24          | 89           | gga-miR-458b-5p   | VPS54              | VPS54, GARP complex subunit                                          |
| 25          | 88           | gga-miR-458b-5p   | GAB2               | GRB2 associated binding protein 2                                    |
| 26          | 88           | gga-miR-458b-5p   | STRBP              | spermatid perinuclear RNA binding protein                            |
| 27          | 88           | gga-miR-458b-5p   | FOXO3              | forkhead box O3                                                      |
| 28          | 87           | gga-miR-458b-5p   | CDH2               | cadherin 2                                                           |
| 29          | 87           | gga-miR-458b-5p   | SNAP91             | synaptosome associated protein 91                                    |
| 30          | 85           | gga-miR-458b-5p   | ELOVL6             | ELOVL fatty acid elongase 6                                          |
| 31          | 85           | gga-miR-458b-5p   | ANKS1B             | ankyrin repeat and sterile alpha motif domain containing 11          |
| 32          | 84           | gga-miR-458b-5p   | ECT2               | epithelial cell transforming 2                                       |
| 33          | 84           | gga-miR-458b-5p   | LHX9               | LIM homeobox 9                                                       |
| 34          | 84           | gga-miR-458b-5p   | GNA13              | G protein subunit alpha 13                                           |
| 35          | 83           | gga-miR-458b-5p   | OTX2               | orthodenticle homeobox 2                                             |
| 36          | 83           | gga-miR-458b-5p   | ZNF367             | zinc finger protein 367                                              |
| 37          | 83           | gga-miR-458b-5p   | NF1                | neurofibromin 1                                                      |
| 38          | 82           | gga-miR-458b-5p   | GRM7               | glutamate metabotropic receptor 7                                    |
| 39          | 82           | gga-miR-458b-5p   | FMR1               | fragile X mental retardation 1                                       |
| 40          | 82           | gga-miR-458b-5p   | ANKIB1             | ankyrin repeat and IBR domain containing 1                           |
| 41          | 82           | gga-miR-458b-5p   | UBA6               | ubiquitin like modifier activating enzyme 6                          |
| 42          | 82           | gga-miR-458b-5p   | CNOT8              | CCR4-NOT transcription complex subunit 8                             |
| 43          | 81           | gga-miR-458b-5p   | PPM1E              | protein phosphatase, Mg <sup>2+</sup> /Mn <sup>2+</sup> dependent 1E |
| 44          | 80           | gga-miR-458b-5p   | ARL8B              | ADP ribosylation factor like GTPase 8B                               |
| 45          | 79           | gga-miR-458b-5p   | HSPA4L             | heat shock protein family A (Hsp70) member 4 like                    |
| 46          | 79           | gga-miR-458b-5p   | BCORL1             | BCL6 corepressor like 1                                              |

|    |    |                 |          |                                                             |
|----|----|-----------------|----------|-------------------------------------------------------------|
| 47 | 78 | gga-miR-458b-5p | IPPK     | inositol-pentakisphosphate 2-kinase                         |
| 48 | 78 | gga-miR-458b-5p | STK39    | serine/threonine kinase 39                                  |
| 49 | 77 | gga-miR-458b-5p | PPFIA1   | PTPRF interacting protein alpha 1                           |
| 50 | 77 | gga-miR-458b-5p | SMARCA1  | SWI/SNF related, matrix associated, actin dependent regul:  |
| 51 | 76 | gga-miR-458b-5p | BBX      | BBX, HMG-box containing                                     |
| 52 | 76 | gga-miR-458b-5p | TBL1XR1  | transducin beta like 1 X-linked receptor 1                  |
| 53 | 76 | gga-miR-458b-5p | MYT1L    | myelin transcription factor 1 like                          |
| 54 | 76 | gga-miR-458b-5p | LDLRAD4  | low density lipoprotein receptor class A domain containing  |
| 55 | 75 | gga-miR-458b-5p | PCDH10   | protocadherin 10                                            |
| 56 | 75 | gga-miR-458b-5p | ANKRD44  | ankyrin repeat domain 44                                    |
| 57 | 75 | gga-miR-458b-5p | BRD3     | bromodomain containing 3                                    |
| 58 | 74 | gga-miR-458b-5p | PTPRF    | protein tyrosine phosphatase, receptor type F               |
| 59 | 74 | gga-miR-458b-5p | LAMA5    | laminin subunit alpha 5                                     |
| 60 | 73 | gga-miR-458b-5p | DCBLD2   | discoidin, CUB and LCCL domain containing 2                 |
| 61 | 73 | gga-miR-458b-5p | ARHGAP12 | Rho GTPase activating protein 12                            |
| 62 | 72 | gga-miR-458b-5p | FCHO2    | FCH domain only 2                                           |
| 63 | 72 | gga-miR-458b-5p | HMGN5    | high mobility group nucleosome binding domain 5             |
| 64 | 72 | gga-miR-458b-5p | BRWD3    | bromodomain and WD repeat domain containing 3               |
| 65 | 71 | gga-miR-458b-5p | VCL      | vinculin                                                    |
| 66 | 71 | gga-miR-458b-5p | PHF21B   | PHD finger protein 21B                                      |
| 67 | 71 | gga-miR-458b-5p | DR1      | down-regulator of transcription 1                           |
| 68 | 70 | gga-miR-458b-5p | STT3B    | STT3B, catalytic subunit of the oligosaccharyltransferase c |
| 69 | 70 | gga-miR-458b-5p | SOWAHC   | soosondawah ankyrin repeat domain family member C           |
| 70 | 69 | gga-miR-458b-5p | PLCXD3   | phosphatidylinositol specific phospholipase C X domain cc   |
| 71 | 69 | gga-miR-458b-5p | PALLD    | palladin, cytoskeletal associated protein                   |
| 72 | 69 | gga-miR-458b-5p | SREK1    | splicing regulatory glutamic acid and lysine rich protein 1 |
| 73 | 69 | gga-miR-458b-5p | ARL4A    | ADP ribosylation factor like GTPase 4A                      |
| 74 | 68 | gga-miR-458b-5p | MET      | MET proto-oncogene, receptor tyrosine kinase                |
| 75 | 68 | gga-miR-458b-5p | TNPO1    | transportin 1                                               |
| 76 | 68 | gga-miR-458b-5p | FAM49A   | family with sequence similarity 49 member A                 |
| 77 | 68 | gga-miR-458b-5p | POU2F1   | POU class 2 homeobox 1                                      |
| 78 | 68 | gga-miR-458b-5p | TSC1     | TSC complex subunit 1                                       |
| 79 | 68 | gga-miR-458b-5p | SNX13    | sorting nexin 13                                            |
| 80 | 67 | gga-miR-458b-5p | LIN28B   | lin-28 homolog B                                            |
| 81 | 67 | gga-miR-458b-5p | NOVA1    | uncharacterized LOC423300                                   |
| 82 | 67 | gga-miR-458b-5p | ALCAM    | activated leukocyte cell adhesion molecule                  |
| 83 | 66 | gga-miR-458b-5p | SPRY3    | sprouty RTK signaling antagonist 3                          |
| 84 | 66 | gga-miR-458b-5p | SMARCA2  | SWI/SNF related, matrix associated, actin dependent regul:  |
| 85 | 66 | gga-miR-458b-5p | CUL4B    | cullin 4B                                                   |
| 86 | 66 | gga-miR-458b-5p | BIRC6    | baculoviral IAP repeat containing 6                         |
| 87 | 65 | gga-miR-458b-5p | PITPNC1  | phosphatidylinositol transfer protein, cytoplasmic 1        |
| 88 | 65 | gga-miR-458b-5p | KIF13A   | kinesin family member 13A                                   |
| 89 | 65 | gga-miR-458b-5p | BICD2    | BICD cargo adaptor 2                                        |
| 90 | 65 | gga-miR-458b-5p | NETO2    | neuropilin and tolloid like 2                               |
| 91 | 65 | gga-miR-458b-5p | CLOCK    | clock circadian regulator                                   |
| 92 | 64 | gga-miR-458b-5p | FGF10    | fibroblast growth factor 10                                 |
| 93 | 64 | gga-miR-458b-5p | CUX2     | cut like homeobox 2                                         |
| 94 | 63 | gga-miR-458b-5p | IBTK     | inhibitor of Bruton tyrosine kinase                         |

|     |    |                 |          |                                                                    |
|-----|----|-----------------|----------|--------------------------------------------------------------------|
| 95  | 63 | gga-miR-458b-5p | BCL7A    | BCL tumor suppressor 7A                                            |
| 96  | 63 | gga-miR-458b-5p | MTDH     | metadherin                                                         |
| 97  | 62 | gga-miR-458b-5p | DLC1     | DLC1 Rho GTPase activating protein                                 |
| 98  | 61 | gga-miR-458b-5p | TEAD1    | TEA domain transcription factor 1                                  |
| 99  | 61 | gga-miR-458b-5p | BEST1    | bestrophin 1                                                       |
| 100 | 61 | gga-miR-458b-5p | SALL3    | spalt like transcription factor 3                                  |
| 101 | 61 | gga-miR-458b-5p | PLXNA1   | plexin A1                                                          |
| 102 | 60 | gga-miR-458b-5p | TMEM200A | transmembrane protein 200A                                         |
| 103 | 60 | gga-miR-458b-5p | PCNP     | PEST proteolytic signal containing nuclear protein                 |
| 104 | 60 | gga-miR-458b-5p | SERTAD2  | SERTA domain containing 2                                          |
| 105 | 60 | gga-miR-458b-5p | UNC5D    | unc-5 netrin receptor D                                            |
| 106 | 60 | gga-miR-458b-5p | PTN      | pleiotrophin                                                       |
| 107 | 59 | gga-miR-458b-5p | LRIG1    | leucine rich repeats and immunoglobulin like domains 1             |
| 108 | 59 | gga-miR-458b-5p | ZNF148   | zinc finger protein 148                                            |
| 109 | 59 | gga-miR-458b-5p | MSL2     | male-specific lethal 2 homolog (Drosophila)                        |
| 110 | 58 | gga-miR-458b-5p | SOX5     | SRY-box 5                                                          |
| 111 | 58 | gga-miR-458b-5p | KCNQ3    | potassium voltage-gated channel subfamily Q member 3               |
| 112 | 58 | gga-miR-458b-5p | CTGF     | connective tissue growth factor                                    |
| 113 | 58 | gga-miR-458b-5p | PYGO1    | pygopus family PHD finger 1                                        |
| 114 | 58 | gga-miR-458b-5p | LUC7L3   | LUC7 like 3 pre-mRNA splicing factor                               |
| 115 | 58 | gga-miR-458b-5p | PAFAH1B1 | platelet activating factor acetylhydrolase 1b regulatory subunit 1 |
| 116 | 57 | gga-miR-458b-5p | LMNB2    | lamin B2                                                           |
| 117 | 57 | gga-miR-458b-5p | SLC12A2  | solute carrier family 12 member 2                                  |
| 118 | 57 | gga-miR-458b-5p | E2F3     | E2F transcription factor 3                                         |
| 119 | 57 | gga-miR-458b-5p | HOMER1   | homer scaffolding protein 1                                        |
| 120 | 56 | gga-miR-458b-5p | MAP3K7   | mitogen-activated protein kinase kinase kinase 7                   |
| 121 | 56 | gga-miR-458b-5p | ADAMTS18 | ADAM metalloproteinase with thrombospondin type 1 motifs 18        |
| 122 | 56 | gga-miR-458b-5p | ANKRD46  | ankyrin repeat domain 46                                           |
| 123 | 55 | gga-miR-458b-5p | MMP16    | matrix metalloproteinase 16                                        |
| 124 | 55 | gga-miR-458b-5p | SLC8A1   | solute carrier family 8 member A1                                  |
| 125 | 55 | gga-miR-458b-5p | USP25    | ubiquitin specific peptidase 25                                    |
| 126 | 55 | gga-miR-458b-5p | WWC2     | WW and C2 domain containing 2                                      |
| 127 | 54 | gga-miR-458b-5p | ZNF608   | zinc finger protein 608                                            |
| 128 | 54 | gga-miR-458b-5p | WDR44    | WD repeat domain 44                                                |
| 129 | 54 | gga-miR-458b-5p | SLC24A3  | solute carrier family 24 member 3                                  |
| 130 | 53 | gga-miR-458b-5p | TMEM33   | transmembrane protein 33                                           |
| 131 | 53 | gga-miR-458b-5p | SEMA3C   | semaphorin 3C                                                      |
| 132 | 52 | gga-miR-458b-5p | SLC35E1  | solute carrier family 35 member E1                                 |
| 133 | 52 | gga-miR-458b-5p | TXNDC5   | thioredoxin domain containing 5                                    |
| 134 | 52 | gga-miR-458b-5p | CNTN1    | contactin 1                                                        |
| 135 | 51 | gga-miR-458b-5p | FGB      | fibrinogen beta chain                                              |
| 136 | 51 | gga-miR-458b-5p | DOK6     | docking protein 6                                                  |
| 137 | 51 | gga-miR-458b-5p | ZCCHC24  | zinc finger CCHC-type containing 24                                |
| 138 | 50 | gga-miR-458b-5p | ATXN1    | ataxin 1                                                           |
| 139 | 50 | gga-miR-458b-5p | KLHL2    | kelch like family member 2                                         |

Note: The target score were predicted by miRDB.



**Table S4 miRNAs targeting CTNNB1 predicted using TargetScan**

| <b>miRNA</b>      | <b>Position in the UTR</b> | <b>seed match</b> | <b>Gene symbol</b> |
|-------------------|----------------------------|-------------------|--------------------|
| gga-miR-193a-3p   | 921-928                    | 8mer              | CTNNB1             |
| gga-miR-193b-3p   | 921-928                    | 8mer              | CTNNB1             |
| gga-miR-103-2-5p  | 15-21                      | 7mer-m8           | CTNNB1             |
| gga-miR-107-5p    | 15-21                      | 7mer-m8           | CTNNB1             |
| gga-miR-6596-3p   | 19-25                      | 7mer-1A           | CTNNB1             |
| gga-miR-130b-5p   | 29-35                      | 7mer-1A           | CTNNB1             |
| gga-miR-1717      | 31-37                      | 7mer-1A           | CTNNB1             |
| gga-miR-1685-3p   | 43-49                      | 7mer-m8           | CTNNB1             |
| gga-miR-6673-3p   | 52-58                      | 7mer-1A           | CTNNB1             |
| gga-miR-6568-3p   | 60-66                      | 7mer-m8           | CTNNB1             |
| gga-miR-1774      | 67-73                      | 7mer-1A           | CTNNB1             |
| gga-miR-7455-3p   | 72-78                      | 7mer-m8           | CTNNB1             |
| gga-miR-3525      | 77-83                      | 7mer-m8           | CTNNB1             |
| gga-miR-6570-5p   | 88-94                      | 7mer-m8           | CTNNB1             |
| gga-miR-1683      | 91-97                      | 7mer-m8           | CTNNB1             |
| gga-miR-7458-3p   | 92-98                      | 7mer-m8           | CTNNB1             |
| gga-miR-215-3p    | 100-106                    | 7mer-1A           | CTNNB1             |
| gga-miR-6552-5p   | 101-107                    | 7mer-1A           | CTNNB1             |
| gga-miR-16-1-3p   | 106-113                    | 8mer              | CTNNB1             |
| gga-miR-16c-3p    | 106-113                    | 8mer              | CTNNB1             |
| gga-miR-30a-3p    | 109-116                    | 8mer              | CTNNB1             |
| gga-miR-6693-3p   | 109-116                    | 8mer              | CTNNB1             |
| gga-miR-30e-3p    | 109-115                    | 7mer-1A           | CTNNB1             |
| gga-miR-6701-3p   | 120-127                    | 8mer              | CTNNB1             |
| gga-miR-757       | 127-133                    | 7mer-m8           | CTNNB1             |
| gga-miR-1690-5p   | 129-135                    | 7mer-1A           | CTNNB1             |
| gga-miR-7439-3p   | 131-137                    | 7mer-m8           | CTNNB1             |
| gga-miR-6587-5p   | 131-137                    | 7mer-1A           | CTNNB1             |
| gga-miR-6581-3p   | 133-139                    | 7mer-1A           | CTNNB1             |
| gga-miR-206       | 151-157                    | 7mer-m8           | CTNNB1             |
| gga-miR-1b-3p     | 151-157                    | 7mer-m8           | CTNNB1             |
| gga-miR-1a-3p     | 151-157                    | 7mer-m8           | CTNNB1             |
| gga-miR-6664-3p   | 152-159                    | 8mer              | CTNNB1             |
| gga-miR-135a-2-3p | 156-162                    | 7mer-1A           | CTNNB1             |
| gga-miR-135a-3-3p | 156-162                    | 7mer-1A           | CTNNB1             |
| gga-miR-138-1-3p  | 179-185                    | 7mer-m8           | CTNNB1             |
| gga-miR-6590-3p   | 189-195                    | 7mer-1A           | CTNNB1             |
| gga-miR-144-3p    | 199-205                    | 7mer-1A           | CTNNB1             |
| gga-miR-101-3p    | 199-205                    | 7mer-1A           | CTNNB1             |
| gga-miR-6630-3p   | 210-216                    | 7mer-m8           | CTNNB1             |
| gga-miR-6713-3p   | 222-228                    | 7mer-m8           | CTNNB1             |
| gga-miR-6545-5p   | 225-231                    | 7mer-1A           | CTNNB1             |
| gga-miR-2131-5p   | 225-231                    | 7mer-m8           | CTNNB1             |
| gga-miR-7482-3p   | 226-232                    | 7mer-m8           | CTNNB1             |
| gga-miR-6605-5p   | 226-232                    | 7mer-m8           | CTNNB1             |
| gga-miR-302c-5p   | 238-245                    | 8mer              | CTNNB1             |

|                  |         |         |        |
|------------------|---------|---------|--------|
| gga-miR-1685-3p  | 253-259 | 7mer-1A | CTNNB1 |
| gga-miR-223      | 265-271 | 7mer-1A | CTNNB1 |
| gga-miR-1781-5p  | 295-302 | 8mer    | CTNNB1 |
| gga-miR-7453-5p  | 304-310 | 7mer-1A | CTNNB1 |
| gga-miR-1782     | 308-314 | 7mer-1A | CTNNB1 |
| gga-miR-1467-5p  | 341-347 | 7mer-1A | CTNNB1 |
| gga-miR-1452     | 368-374 | 7mer-m8 | CTNNB1 |
| gga-miR-6565-5p  | 368-374 | 7mer-m8 | CTNNB1 |
| gga-miR-1623     | 379-386 | 8mer    | CTNNB1 |
| gga-miR-6641-5p  | 397-403 | 7mer-1A | CTNNB1 |
| gga-miR-1467-5p  | 398-404 | 7mer-m8 | CTNNB1 |
| gga-miR-1416-3p  | 417-424 | 8mer    | CTNNB1 |
| gga-miR-138-1-3p | 422-428 | 7mer-1A | CTNNB1 |
| gga-miR-6590-3p  | 423-429 | 7mer-1A | CTNNB1 |
| gga-miR-7463-3p  | 424-430 | 7mer-1A | CTNNB1 |
| gga-miR-1625-5p  | 440-446 | 7mer-m8 | CTNNB1 |
| gga-miR-1456-5p  | 443-449 | 7mer-m8 | CTNNB1 |
| gga-miR-126-5p   | 462-469 | 8mer    | CTNNB1 |
| gga-miR-7457-5p  | 503-509 | 7mer-1A | CTNNB1 |
| gga-miR-1639     | 506-512 | 7mer-1A | CTNNB1 |
| gga-miR-7469-5p  | 519-525 | 7mer-m8 | CTNNB1 |
| gga-miR-3531-3p  | 520-527 | 8mer    | CTNNB1 |
| gga-miR-1593     | 525-531 | 7mer-1A | CTNNB1 |
| gga-miR-1555-3p  | 540-546 | 7mer-1A | CTNNB1 |
| gga-miR-6552-3p  | 553-559 | 7mer-1A | CTNNB1 |
| gga-miR-302c-5p  | 555-561 | 7mer-1A | CTNNB1 |
| gga-miR-7473-5p  | 580-586 | 7mer-m8 | CTNNB1 |
| gga-miR-458b-5p  | 590-596 | 7mer-m8 | CTNNB1 |
| gga-miR-21-3p    | 641-648 | 8mer    | CTNNB1 |
| gga-miR-6571-3p  | 664-670 | 7mer-m8 | CTNNB1 |
| gga-miR-429-3p   | 673-679 | 7mer-1A | CTNNB1 |
| gga-miR-200b-3p  | 673-679 | 7mer-1A | CTNNB1 |
| gga-miR-124c-5p  | 687-693 | 7mer-1A | CTNNB1 |
| gga-miR-1796     | 700-706 | 7mer-m8 | CTNNB1 |
| gga-miR-1416-5p  | 715-721 | 7mer-1A | CTNNB1 |
| gga-miR-1807     | 766-772 | 7mer-1A | CTNNB1 |
| gga-miR-6544-5p  | 767-773 | 7mer-1A | CTNNB1 |
| gga-miR-1559-3p  | 779-785 | 7mer-1A | CTNNB1 |
| gga-let-7k-3p    | 799-806 | 8mer    | CTNNB1 |
| gga-let-7f-3p    | 799-806 | 8mer    | CTNNB1 |
| gga-let-7a-3p    | 799-806 | 8mer    | CTNNB1 |
| gga-let-7j-3p    | 800-806 | 7mer-1A | CTNNB1 |
| gga-miR-1463     | 816-822 | 7mer-1A | CTNNB1 |
| gga-miR-1625-5p  | 823-829 | 7mer-1A | CTNNB1 |
| gga-miR-1612     | 835-841 | 7mer-m8 | CTNNB1 |
| gga-miR-6701-3p  | 854-860 | 7mer-m8 | CTNNB1 |
| gga-miR-1306-5p  | 863-869 | 7mer-1A | CTNNB1 |
| gga-miR-1667-3p  | 876-882 | 7mer-m8 | CTNNB1 |

|                 |           |         |        |
|-----------------|-----------|---------|--------|
| gga-miR-200b-5p | 924-931   | 8mer    | CTNNB1 |
| gga-miR-133c-5p | 963-969   | 7mer-m8 | CTNNB1 |
| gga-miR-7459-3p | 978-984   | 7mer-1A | CTNNB1 |
| gga-miR-6700-5p | 979-985   | 7mer-1A | CTNNB1 |
| gga-miR-6547-5p | 979-985   | 7mer-1A | CTNNB1 |
| gga-miR-187-5p  | 991-997   | 7mer-m8 | CTNNB1 |
| gga-miR-1556    | 995-1001  | 7mer-m8 | CTNNB1 |
| gga-miR-6566-3p | 996-1002  | 7mer-m8 | CTNNB1 |
| gga-miR-214     | 997-1003  | 7mer-m8 | CTNNB1 |
| gga-miR-383-3p  | 999-1006  | 8mer    | CTNNB1 |
| gga-miR-3594-5p | 1000-1006 | 7mer-1A | CTNNB1 |
| gga-miR-1697    | 1018-1025 | 8mer    | CTNNB1 |
| gga-miR-153-5p  | 1024-1030 | 7mer-m8 | CTNNB1 |
| gga-miR-460a-5p | 1027-1033 | 7mer-m8 | CTNNB1 |
| gga-miR-217-5p  | 1028-1034 | 7mer-m8 | CTNNB1 |
| gga-miR-1796    | 1030-1036 | 7mer-1A | CTNNB1 |
| gga-miR-1620    | 1051-1057 | 7mer-m8 | CTNNB1 |
| gga-miR-7463-3p | 1054-1061 | 8mer    | CTNNB1 |
| gga-miR-1643-3p | 1061-1067 | 7mer-1A | CTNNB1 |

---

**Table S5 miRNAs targeting CTNNB1 predicted using miRDB**

| <b>Target rank</b> | <b>Target score</b> | <b>miRNA name</b> | <b>Gene symbol</b> | <b>Gene description</b> |
|--------------------|---------------------|-------------------|--------------------|-------------------------|
| 1                  | 97                  | gga-miR-9b-3p     | CTNNB1             | catenin beta 1          |
| 2                  | 96                  | gga-miR-1625-5p   | CTNNB1             | catenin beta 1          |
| 3                  | 94                  | gga-miR-7463-3p   | CTNNB1             | catenin beta 1          |
| 4                  | 94                  | gga-miR-458b-5p   | CTNNB1             | catenin beta 1          |
| 5                  | 91                  | gga-let-7f-3p     | CTNNB1             | catenin beta 1          |
| 6                  | 91                  | gga-let-7a-3p     | CTNNB1             | catenin beta 1          |
| 7                  | 91                  | gga-let-7k-3p     | CTNNB1             | catenin beta 1          |
| 8                  | 89                  | gga-miR-1556      | CTNNB1             | catenin beta 1          |
| 9                  | 88                  | gga-miR-1623      | CTNNB1             | catenin beta 1          |
| 10                 | 83                  | gga-miR-200b-5p   | CTNNB1             | catenin beta 1          |
| 11                 | 82                  | gga-miR-1467-5p   | CTNNB1             | catenin beta 1          |
| 12                 | 78                  | gga-miR-1667-3p   | CTNNB1             | catenin beta 1          |
| 13                 | 77                  | gga-miR-1559-3p   | CTNNB1             | catenin beta 1          |
| 14                 | 77                  | gga-miR-214       | CTNNB1             | catenin beta 1          |
| 15                 | 75                  | gga-miR-133c-5p   | CTNNB1             | catenin beta 1          |
| 16                 | 72                  | gga-miR-6547-5p   | CTNNB1             | catenin beta 1          |
| 17                 | 72                  | gga-miR-1416-3p   | CTNNB1             | catenin beta 1          |
| 18                 | 72                  | gga-miR-6700-5p   | CTNNB1             | catenin beta 1          |
| 19                 | 70                  | gga-miR-12280-5p  | CTNNB1             | catenin beta 1          |
| 20                 | 68                  | gga-miR-12209-5p  | CTNNB1             | catenin beta 1          |
| 21                 | 68                  | gga-miR-383-3p    | CTNNB1             | catenin beta 1          |
| 22                 | 66                  | gga-miR-193a-3p   | CTNNB1             | catenin beta 1          |
| 23                 | 66                  | gga-miR-193b-3p   | CTNNB1             | catenin beta 1          |
| 24                 | 66                  | gga-miR-12278-3p  | CTNNB1             | catenin beta 1          |
| 25                 | 64                  | gga-miR-6566-3p   | CTNNB1             | catenin beta 1          |
| 26                 | 62                  | gga-miR-1697      | CTNNB1             | catenin beta 1          |
| 27                 | 62                  | gga-miR-1643-3p   | CTNNB1             | catenin beta 1          |
| 28                 | 60                  | gga-let-7j-3p     | CTNNB1             | catenin beta 1          |
| 29                 | 60                  | gga-miR-6590-3p   | CTNNB1             | catenin beta 1          |
| 30                 | 59                  | gga-miR-1456-5p   | CTNNB1             | catenin beta 1          |
| 31                 | 59                  | gga-miR-122b-5p   | CTNNB1             | catenin beta 1          |
| 32                 | 58                  | gga-miR-460a-5p   | CTNNB1             | catenin beta 1          |
| 33                 | 55                  | gga-miR-7459-3p   | CTNNB1             | catenin beta 1          |
| 34                 | 55                  | gga-miR-124c-5p   | CTNNB1             | catenin beta 1          |
| 35                 | 55                  | gga-miR-21-3p     | CTNNB1             | catenin beta 1          |
| 36                 | 53                  | gga-miR-138-1-3p  | CTNNB1             | catenin beta 1          |
| 37                 | 53                  | gga-miR-12286-3p  | CTNNB1             | catenin beta 1          |
| 38                 | 53                  | gga-miR-3531-3p   | CTNNB1             | catenin beta 1          |
| 39                 | 52                  | gga-miR-7457-5p   | CTNNB1             | catenin beta 1          |

**Table S6 miRNAs targeting CTNNB1 predicted both by TargetScan and miRDB**

| <b>Target rank</b> | <b>Target score</b> | <b>miRNA name</b> | <b>Gene symbol</b> | <b>Gene description</b> |
|--------------------|---------------------|-------------------|--------------------|-------------------------|
| 1                  | 96                  | gga-miR-1625-5p   | CTNNB1             | catenin beta 1          |
| 2                  | 94                  | gga-miR-458b-5p   | CTNNB1             | catenin beta 1          |
| 3                  | 94                  | gga-miR-7463-3p   | CTNNB1             | catenin beta 1          |
| 4                  | 91                  | gga-let-7f-3p     | CTNNB1             | catenin beta 1          |
| 5                  | 91                  | gga-let-7a-3p     | CTNNB1             | catenin beta 1          |
| 6                  | 91                  | gga-let-7k-3p     | CTNNB1             | catenin beta 1          |
| 7                  | 89                  | gga-miR-1556      | CTNNB1             | catenin beta 1          |
| 8                  | 88                  | gga-miR-1623      | CTNNB1             | catenin beta 1          |
| 9                  | 83                  | gga-miR-200b-5p   | CTNNB1             | catenin beta 1          |
| 10                 | 82                  | gga-miR-1467-5p   | CTNNB1             | catenin beta 1          |
| 11                 | 78                  | gga-miR-1667-3p   | CTNNB1             | catenin beta 1          |
| 12                 | 77                  | gga-miR-1559-3p   | CTNNB1             | catenin beta 1          |
| 13                 | 77                  | gga-miR-214       | CTNNB1             | catenin beta 1          |
| 14                 | 75                  | gga-miR-133c-5p   | CTNNB1             | catenin beta 1          |
| 15                 | 72                  | gga-miR-6547-5p   | CTNNB1             | catenin beta 1          |
| 16                 | 72                  | gga-miR-1416-3p   | CTNNB1             | catenin beta 1          |
| 17                 | 72                  | gga-miR-6700-5p   | CTNNB1             | catenin beta 1          |
| 18                 | 68                  | gga-miR-383-3p    | CTNNB1             | catenin beta 1          |
| 19                 | 66                  | gga-miR-193a-3p   | CTNNB1             | catenin beta 1          |
| 20                 | 66                  | gga-miR-193b-3p   | CTNNB1             | catenin beta 1          |
| 21                 | 64                  | gga-miR-6566-3p   | CTNNB1             | catenin beta 1          |
| 22                 | 62                  | gga-miR-1697      | CTNNB1             | catenin beta 1          |
| 23                 | 62                  | gga-miR-1643-3p   | CTNNB1             | catenin beta 1          |
| 24                 | 60                  | gga-let-7j-3p     | CTNNB1             | catenin beta 1          |
| 25                 | 60                  | gga-miR-6590-3p   | CTNNB1             | catenin beta 1          |
| 26                 | 59                  | gga-miR-1456-5p   | CTNNB1             | catenin beta 1          |
| 27                 | 58                  | gga-miR-460a-5p   | CTNNB1             | catenin beta 1          |
| 28                 | 55                  | gga-miR-7459-3p   | CTNNB1             | catenin beta 1          |
| 29                 | 55                  | gga-miR-124c-5p   | CTNNB1             | catenin beta 1          |
| 30                 | 55                  | gga-miR-21-3p     | CTNNB1             | catenin beta 1          |
| 31                 | 53                  | gga-miR-138-1-3p  | CTNNB1             | catenin beta 1          |
| 32                 | 53                  | gga-miR-3531-3p   | CTNNB1             | catenin beta 1          |
| 33                 | 52                  | gga-miR-7457-5p   | CTNNB1             | catenin beta 1          |

Note: The target score were predicted by miRDB.
